# Supplementary material for: Exploring the Pharmacological Mechanisms of Tripterygium wilfordii Hook F against Cardiovascular Disease Using Network Pharmacology and Molecular Docking
Source: Hindawi journal article supplement (doi:10.1155/2021/5575621), 2021-01-01
Supplement: f1 [file 5575621.f1.zip]

## **Known targets of TwHF**

### **Swiss Target Prediction**

CYP19A1  
G6PD  
HSD17B3  
CDC25A  
SERPINA6  
SHBG  
AR  
GABBR1  
HSD11B1  
NPC1L1  
POLB  
GPBAR1  
AKR1B10  
VDR  
HSD11B2  
NR1H4  
GABRA2  
GABRB2  
GABRG2  
FABP4  
PPARA  
FABP3  
FABP5  
PPARD  
FABP2  
SLC22A6  
UGT2B7  
PTGFR  
FNTA  
FNTB  
HAO1  
FFAR1  
KDM2A  
PHF8  
KDM5C  
CDC45  
PTPRC  
CNR2  
CDC25B  
PLG  
CCR1  
PTGER2  
PRKCA  
ALOX5AP  
SHH  
CACNA2D1  
STS  
NR1H2  
PTPN1  
ESR1

ESR2  
KCNA5  
KCNA3  
SLC6A12  
GSTK1  
LTA4H  
CHRNA7  
TRPM8  
CA4  
MDM2  
GNRHR  
P2RX3  
NPY5R  
TRPV1  
JAK2  
AGTR1  
PRKCD  
SRD5A1  
HSD3B1  
TACR1  
HMGCR  
EPHX2  
PIK3CB  
ACACB  
SLC5A1  
PRKCG  
RPS6KA5  
GLRA1  
KCNH2  
KDR  
HTR2B  
PTAFR  
MAPK14  
F2R  
AKR1C3  
TBXAS1  
RXRA  
DUT  
PYGL  
PLA2G7  
PIM1  
SLC6A2  
TACR2  
PIM3  
JAK3  
C5AR1  
APP  
PDE2A  
MAPK13  
PDE10A  
MGLL  
FASN

SGK1  
CYP51A1  
NR1H3  
RORC  
CYP17A1  
SREBF2  
CYP2C19  
RORA  
SLC6A4  
BCHE  
CHRM2  
NR1I3  
ACHE  
PTGER1  
PTGES  
CES2  
DHCR7  
SQLE  
PTPN6  
NOS2  
NR3C1  
PPARG  
CHRM4  
DRD2  
PREP  
PTGER4  
IDO1  
ATP12A  
PTGIR  
DHCR7  
EBP  
TERT  
FABP1  
SIGMAR1  
ADORA3  
MAPK3  
PTPN11  
MDM4  
TTK  
PTPRF  
PLA2G1B  
ACP1  
AVPR2  
AVPR1A  
SCD  
IGF1R  
SRC  
ALK  
BACE2  
CCR5  
ADRA2C  
PRKCB

INCENP  
AURKB  
PRKCE  
PRKCQ  
PTGER3  
PTGDR  
GRM2  
TOP1  
HIF1A  
CNR1  
OPRM1  
CD81  
PTPN2  
PDE4D  
LTB4R  
ALOX5  
PTGS2  
NR3C2  
FAAH  
PTGS1  
SLC6A3  
SRD5A2  
PRKCH  
PGR  
PTGDR2  
AMPD2  
GRIK1  
GRIK2  
IL6  
GLUL  
MMP3  
MMP1  
MMP2  
BACE1  
EDNRB  
EDNRA  
SAE1  
UBA2  
CES1  
POLA1  
HSF1  
MMP13  
ITGB1  
ITGA4  
UBLCP1  
SLC10A2  
SLC10A1  
MME  
S1PR2  
PLCG1  
IKBKB  
EPHA2

ACE  
ST3GAL1  
PPM1B  
PPP1CC  
TNF  
HDAC6  
HDAC1  
PLA2G4A  
CCKBR  
ITGA2B  
ITGB3  
OPRD1  
RARG  
RXRG  
BRS3  
TYMS  
RXRB  
XIAP  
HCAR2  
EPHB2  
EPHA5  
EPHA4  
EPHA8  
EPHA6  
EPHA7  
EPHB3  
EPHA3  
EPHB1  
EPHB4  
EPHA1  
EPHB6  
THRA  
THRB  
PGGT1B  
FNTA  
ITGAV  
MCL1  
PPP2CA  
DGAT1  
FDFT1  
CMA1  
CYSLTR1  
MAPK10  
CPB2  
ALOX15  
ALOX12  
CALCRL  
SLC29A1  
OXTR  
MMP9  
CYP1B1  
IGFBP6

IGFBP4  
IGFBP5  
IGFBP2  
IGFBP3  
IGFBP1  
NOX4  
XDH  
CA2  
CA7  
CA12  
SLC37A4  
HSP90AB1  
CETP  
MAPT  
KDM4E  
TOP2A  
INSR  
PTPRS  
GLO1  
MYLK  
DAPK1  
SYK  
ABCC1  
PIK3CG  
MPG  
APEX1  
EGLN1  
SLC22A12  
HSP90B1  
DUSP3  
NQO2  
PIK3CA  
CDC7  
EGFR  
F2  
DRD4  
MPO  
PIK3R1  
ADORA2A  
CA1  
GSK3B  
HSD17B2  
CA3  
CA6  
CDK1  
CA14  
CA9  
CSNK2A1  
CXCR1  
CAMK2B  
CA5A  
ABCG2

AKR1C2  
AKR1C1  
AKR1C4  
CA13  
ADORA1  
AKR1A1  
KDM4C  
KIT  
GPR35  
TNNC1  
TNNT2  
TNNI3  
CDK5R1  
CDK5  
CCNB3  
CDK1  
CCNB1  
CCNB2  
CDK6  
CDK2  
ARG1  
TYR  
HSD17B1  
AHR  
ESRRA  
MKNK2  
MKNK1  
THRB  
RCE1  
RARB  
RARA  
ECE1  
AMPD1  
AMPD3  
GSK3A  
BCL2L2  
TP53  
MMP8  
CCR2  
TBXA2R  
BRD4  
TKT  
CSF1R  
FLT1  
OPRL1  
SLC6A9  
PDE7A  
AKR1B1  
CSNK2A2  
AURKA  
TTL  
DRD5

CDC25C  
PTK2  
HAO2  
IMPDH1  
MTOR  
CTSA  
CPA1  
PDE5A  
DPP4  
HTR2A  
SLC6A1  
RPA1  
ADAMTS5  
MMP14  
ITGB7  
GCK  
RBP4  
CDK2  
CCNA1  
CCNA2  
GRIA2  
TGFBFR1  
KDM4A  
ABCB1  
MMP12  
CTSD  
REN  
AVPR1B  
NCOR2  
HDAC3  
HDAC8  
CASP8  
CASP1  
CFD  
F10  
CAPN1  
CDK9  
ADAM17  
CCNE1  
CDK9  
CCNT1  
CDK7  
CDK4  
CTSK  
CTSS  
CTSL  
CTSG  
ADAM10  
CTSV  
CTSB  
CCNB1  
CDK7



CCNH  
IMPDH2  
CAPN2  
PSMB9  
HTR1A  
CASP3  
HTR7  
MAP2K1  
PAK4  
PAK1  
CCND1  
CHRM3  
DRD3  
IRAK4  
STAT3  
PSMB5  
JAK1  
TYK2  
SCN9A  
SEM1  
PSMD8  
PSMD4  
PSMD13  
PSMD7  
PSMD6  
PSMD11  
PSMD12  
PSMD3  
PSMD2  
PSMC5  
PSMC3  
PSMC6  
PSMC4  
PSMC1  
PSMC2  
ADRM1  
PSMD14  
PSMD1  
PSMB7  
PSMB4  
PSMB3  
PSMB11  
PSMB10  
PSMA8  
PSMA7  
PSMA6  
PSMA5  
PSMA4  
PSMA3  
PSMA2  
PSMA1  
PSMB6

PSMB9  
PSMB8  
PSMB5  
PSMB1  
PSMB2  
ADRA1A  
TAB1  
MAP3K7  
TNK2  
HTR2C  
RASGRP3  
GBA  
FKBP1A  
ADK  
BDKRB1  
PSMB8  
NTRK1  
PDE6A  
BRAF  
PAK3  
PAK2  
ADRB1  
VHL  
ELOC  
ELOB  
TK2  
LIPG  
PDE4A  
SLC5A2  
KARS  
CCNE2  
CCNE1  
CXCR2  
PIM2  
GABRA5  
GALR1  
GALR2  
MCHR1  
PRKDC  
ATP6AP1  
TMIGD3  
HK2  
HK1  
CSNK1A1  
PSMB1  
PIK3CD  
P2RX7  
PLEC  
CASP7  
SIRT2  
MAP3K9  
TRPA1

F11  
PIK3CA  
FLT3  
PFKFB3  
MAP3K1  
ADCY1  
CASR  
DYRK1A  
MAPK1  
PSEN2  
PSENEN  
NCSTN  
APH1A  
PSEN1  
APH1B  
SCARB1  
BRPF1  
RPS6KB1  
SLC16A1  
SLC2A1  
CTSE  
AURKC  
BCL2  
PDE4B  
CYP26A1  
PIN1  
CPT1A  
CPT1B  
AGTR2  
FGFR1  
CPT2  
CACNA1G  
BMP1  
CPB1  
PDGFRB  
ITGB6  
PTPN22  
OGFRL1  
PRSS1  
CTRC  
EPAS1  
PLA2G2A  
NLRP3  
JUN  
CYP24A1  
MTNR1A  
MTNR1B  
TLR9  
MC5R  
F2RL1  
ABL1  
BCL2L1

LGALS3  
LGALS9  
ERBB2  
HCRTR2  
HCRTR1  
ABCC9  
NFKB1  
ATR  
RELA  
ROS1  
F9  
BDKRB2  
BRD2  
BRD3  
LGMN  
SMO  
PPID  
PPIB  
PPIG  
HSP90AA1  
TRHR  
PLAT  
TSPO  
UGCG  
ROCK2  
TSHR  
MAPK8  
GRM5  
NTRK2  
LDLR  
CRHR1  
MET  
PANK3  
RPS6KA3  
NPBWR1  
GABRB3  
GABRA3  
GABRG2  
GABRA1  
TK1  
CCNC  
CDK8  
PDE9A  
GPR139  
GRM1  
PDE1C  
EPHX1  
S1PR3  
CYP11B1  
HLA-DRB1  
KCND3  
OPRK1

LIPA  
SLC18A3  
RHOA  
TRPV4  
PABPC1  
PRCP  
GABBR2  
RASGRP1  
PPP5C  
PPP1CA  
RAPGEF4  
GCGR  
KCNQ2  
PAM  
KCNQ1  
PKM  
PRMT3  
HSD17B7  
CHRNA4  
CLK4  
LCK  
HDAC2  
MAPKAPK2  
CSNK1G1  
CYP11B2  
HRH3  
CSNK1D  
HRH4  
F2RL3  
FLT4  
PIP4K2C  
SLC27A1  
HTR6  
YES1  
GSTO1  
HIPK1  
DBF4  
HNF4A  
TRAP1  
NR4A1  
PGGT1B  
OGT  
DHFR  
LRRK2  
PDE3A  
GSTM1  
ATP2A1  
MAOB  
PCSK7  
VAV1  
IARS  
NFKBIA

ADRA1D  
MGMT  
ADORA2B  
GLI1  
IL1B  
LPL  
MMP7  
KDM4B  
KDM5B  
MAPK9  
EWS-Fli1  
EIF2AK3  
ALPL  
ACPP  
ATP1A1  
PARP1  
PTPA  
ELANE  
SLC5A4  
SLC28A3  
ALDH2  
TAS2R31  
EIF4A1  
CBR1  
LGALS1  
CA5B  
LGALS7  
TDP1  
CHIA  
FOLH1  
HRAS  
AMY2A  
ALB  
TARS  
SLC28A2  
FHIT  
BTK  
TRPM2  
SERPINE1  
FUT6  
NRP1  
DOT1L  
CASP6  
METAP2  
CHEK1  
ODC1  
PLA2G5  
PLA2G10  
KLK1  
KLK2  
ESRRB  
SPHK2

SPHK1  
MMP16  
MMP15  
MMP26  
NAAA  
PDK1  
CDK3  
WEE1  
RET  
DRD1  
CLK1  
DYRK1B  
DNM1  
F3  
TNKS2  
TNKS  
HDAC11  
PDF  
HDAC10  
HDAC5  
NEK1  
EEF2K  
ADRA2A  
ADRA2B  
HDAC7  
CAPN1  
CAPNS1  
FCER2  
ADRA1B  
PITRM1  
CACNA1H  
PRKCZ  
RAC1  
PTK2B  
MIF  
PASK  
HPSE  
KIF11  
ITK  
ADCY10  
ELAVL1  
GABRA1  
GABRB2  
HTR1B  
GPR55  
CXCR3  
CREBBP  
LIMK2  
SAE1  
EP300  
KAT2B  
PTK6

TRPC6  
TRPC3  
PDE3B  
GC  
PLA2G2C  
MAP3K20  
AKT1  
ADRB2  
MOGAT2  
EZH2  
ENPP2  
CCND3  
CDK4  
CCND2  
IRAK1  
AXL  
MAP4K2  
MERTK  
LTK  
TACR3  
AKT2  
RORB  
HTR1D  
CCKAR  
FAP  
CX3CR1  
PGA5  
MAP3K11  
MAP3K10  
LIPC  
PRSS3  
SLC18A2  
NR1I2  
NR5A1  
CHRNA3  
CHRN B4  
NR5A2  
CHRNA4  
CHRN B2  
CHRM1  
HPGD  
HRH1  
ALDH1A1  
CHRM5  
NPSR1  
LSS  
MGAT2  
S1PR1  
SOAT1



# Known therapeutic targets acting on CVD

| OMIM    | Drugbank | GeneCards |
|---------|----------|-----------|
| RAI     | PTGS1    | TTN       |
| HEY2    | PPARG    | IL6       |
| HSPB7   | PTGS2    | APOE      |
| MFS     | FFAR1    | TNF       |
| DGS     | FADS1    | FBN1      |
| WBS     | SLC8A1   | ACE       |
| FBN1    | ACSL4    | LMNA      |
| NF1     | PPARD    | INS       |
| CRP     | TRPV1    | IL10      |
| PXE     | ACSL3    | NOTCH1    |
| ACE     | ACE      | GLA       |
| CYP2C19 | GABRA1   | MTHFR     |
| APOE    | GABRA2   | VWF       |
| HOS     | GABRA3   | APP       |
| HALP1   | GABRA4   | MYH7      |
| IL18    | GABRA5   | CRP       |
| HP      | GABRA6   | TGFB1     |
| GATA6   | GABRB1   | SCN5A     |
| CMH1    | GABRB2   | SNCA      |
| PON1    | GABRB3   | TP53      |
| ESR1    | GABRD    | VEGFA     |
| TBX1    | GABRE    | APOB      |
| IL6     | GABRG1   | NOS3      |
| ABCA1   | GABRG2   | GBA       |
| CSTLO   | GABRG3   | TLR4      |
| KDR     | GABRP    | F2        |
| PPARG   | GABRQ    | CD40LG    |
| HMGCR   | ADRA2B   | IFNG      |
| CITED2  | CHRM1    | IL1B      |
| UCP2    | CHRNA2   | APOA1     |
| ECTOL1  | P2RY12   | FLNA      |
| IGHD1A  | NR3C1    | PPARG     |
| SGS     | ESR1     | SERPINE1  |
| NOTCH1  | CHRM2    | MAPT      |
| BCAR1   | NR1I2    | PSEN1     |
| GACI1   | HMGCR    | CCL2      |
| FABP2   | ADRB1    | NOD2      |
| PTEN    | ADRB2    | LEP       |
| APOA1   | ADRB3    | RYR2      |
| AAAS    | HTR2C    | MYH6      |
| ADM     | SLC6A4   | HLA-DRB1  |
| HABP2   | GLRA1    | CTLA4     |
| NIDDM   | SLC6A2   | FBN2      |
| WFS1    | PLA2G2A  | TTN-AS1   |
| MELAS   | NOS2     | DMD       |
| FTHS    | NOS3     | IGF1      |
| CMD1DD  | MAPK14   | ABCA1     |
| GACI2   | MAPK12   | PKD1      |
| ATFB14  | MAPK11   | MYBPC3    |
| TNCY    | MAPK13   | RET       |

ARCL2D  
PUFAQTL1  
NKX2-5  
SCN2B  
ADK  
ALOX5  
NCOA3  
NSD1  
APOBR  
MIR33A  
VPS54  
MYH11  
PTPRB  
TBX20  
ORTHYP1  
MMP9  
GOT1  
FOXC1  
MTTL1  
GUSB  
CTHM  
CX3CR1  
GBA  
ACDMPV  
ITGB1  
HDLQCQ12  
TH  
ABCC6  
PVNH1  
NR1H2  
FADD  
ARCL3A  
HFM  
BDKRB2  
PLXND1  
EDSSPD1  
HSAN3  
ACH  
MSPKA  
ALGS2  
VSD1  
NPHP16  
MCAHS1  
OI18  
ARHI2  
MEOX2  
LIMK1  
SAA1  
MBL2  
CRKL  
ACADS  
RERE

ALOX5AP  
ADRA1A  
ADRA1B  
ADRA1D  
CA1  
CA2  
CA4  
SQLE  
PRKCB  
PRKCA  
CSNK2A1  
SYK  
CA12  
CA9  
CA3  
CA5A  
CA5B  
CA6  
CA7  
CA14  
PRKACA  
PPARA  
F2R  
CACNA1C  
MME  
NCOA1

ALB  
MYH11  
KCNQ1  
ELN  
CACNA1C  
MPO  
EDN1  
TNFRSF11B  
AGTR1  
SOD1  
ICAM1  
AKT1  
REN  
PON1  
KCNH2  
LPL  
CCR6  
PRKAG2  
LAMP2  
STAT3  
GATA4  
JAG1  
NPC1  
PRNP  
BDNF  
NKX2-5  
MMP2  
TGFB2  
GAA  
PRKN  
COL3A1  
CST3  
TTR  
LDLR  
PKHD1  
IL1RN  
SMAD4  
NPPA  
ESR1  
RYS1  
ABCA4  
F8  
VDR  
FAS  
ANK2  
NOS2  
SERPINC1  
CAV3  
AGT  
ACTA2  
THBD  
CETP

FBN2  
ARMC4  
NPY1R  
PRKG1  
FADS1  
EDSCV  
COL15A1  
ALDH18A1  
THOP1  
EPHB4  
NLN  
ARMD1  
LPL  
PPARGC1A  
AOVD1  
VEGFA  
CHDS7  
AGTR1  
EFEMP2  
SSKS  
HTR2B  
NR1H3  
RTSC1  
AOMS1  
NR3C1  
ANGPTL3  
ECYT1  
FXS  
HJCYS  
LS  
DFNB68  
HTGTI  
CPPB2  
GPHYSD1  
LDLCQ8  
ATFB5  
PRDX2  
THRA  
ARRB1  
INVS  
LTBP3  
ACADM  
CYBA  
TET2  
TRIM72  
NTF3  
TSTD1  
IFNA1  
SVAS  
COL18A1  
GPX1  
PIK3CG

HLA-B  
TLR2  
SMAD3  
DES  
TGFB2  
MMP1  
CAT  
ADIPOQ  
EGFR  
COMT  
TNNT2  
TBX5  
JUP  
F5  
GDNF  
PKD2  
PSAP  
GFAP  
TGFB1  
KIT  
GJB1  
TNFRSF1A  
LRRK2  
PTPN11  
SMPD1  
CDKN2A  
MPZ  
FN1  
DSP  
LCAT  
PTPN22  
KRAS  
POMC  
HFE  
PTEN  
SPP1  
CFTR  
COL5A1  
EDNRB  
TNNI3  
IL2RA  
MTOR  
HMOX1  
MME  
SLC17A5  
MMP3  
TNFRSF1B  
CXCL8  
RETN  
MMP9  
HRAS  
ENG

CYP19A1  
KIDINS220  
DTGA1  
LDS1  
GDF15  
NIHF  
SMAD6  
ARCL1B  
KLK1  
ADAP2  
ARCL1C  
TGFB2  
MTHFR  
HTX5  
COL3A1  
CRHR2  
EVC  
NXD  
MCLDS  
ANHD  
CMD1D  
ARMD4  
VSD2  
CILD23  
SSS2  
MC1DN13  
CMH21  
HSD11B1  
UGT1A1  
NPPA  
MMP3  
ADAM10  
EPHB6  
CHD7  
NF1  
MIR33B  
SLC6A2  
IQCE  
INSR  
STWS  
DES  
HBG2  
TFAP2B  
PRKCH  
CELF2  
CMD1V  
FRNS  
MESP1  
FHBL2  
MFN2  
AOVD2  
TBXA2R

COL2A1  
EPO  
GGT1  
NPPB  
MUC1  
JAK2  
B2M  
LRP5  
CYBB  
CTNNA1  
NLRP3  
PRTN3  
CP  
TBX1  
STAT1  
TH  
GJA1  
VCP  
ELANE  
FGF23  
FOXP3  
MIR21  
NF1  
HTT  
PLG  
TRPV4  
GNAS  
COG2  
CBS  
POLG  
APOC3  
NGF  
AGL  
SOD2  
TNFSF11  
CFH  
CCR5  
CD40  
HLA-A  
MAPK1  
WT1  
IL13  
CYBA  
LIPC  
MGP  
FGFR1  
COL1A1  
ABCB1  
ATP7B  
EGF  
PLOD1  
F7

|         |         |
|---------|---------|
| TUBB1   | ADRB2   |
| NS8     | HBB     |
| ACE2    | BRCA2   |
| GDF1    | MEFV    |
| BTHS    | LEPR    |
| ELN     | DSC2    |
| FOXC2   | MED12   |
| ADM2    | VHL     |
| NIDDM1  | IL18    |
| MEND    | BRAF    |
| STL1    | GHRL    |
| HHF2    | PMP22   |
| XPB     | NAGLU   |
| VSD3    | SKI     |
| LDS5    | IL23R   |
| PKD1    | HCN4    |
| GRD1    | FGFR3   |
| FGQTL2  | FLT1    |
| GPR14   | ECE1    |
| VLDLR   | VCL     |
| NPR1    | BRCA1   |
| THBD    | PCSK9   |
| CMKLR1  | PDGFRB  |
| NSD2    | PIK3CA  |
| DAND5   | NR3C2   |
| MIR21   | ERCC6   |
| FGD6    | MYLK    |
| HNRNPA1 | TSC2    |
| PLEKHA1 | MIR146A |
| IL4     | SLC6A3  |
| ABDS    | C3      |
| EPOR    | LDB3    |
| IGF2    | MECP2   |
| NRP1    | SLC6A4  |
| WASF2   | PTGS2   |
| SEMA3C  | IGF2    |
| KLF2    | BAG3    |
| GATA4   | ENPP1   |
| SELP    | CD36    |
| LDS2    | MYC     |
| EGFL7   | TF      |
| GSD2    | NR3C1   |
| SOX18   | FGFR2   |
| CBS     | MTR     |
| LDS3    | TERT    |
| ASIP    | HSPD1   |
| TRNT1   | SOX10   |
| XLHR    | FGA     |
| ISL1    | ACTC1   |
| MAPK7   | HEXA    |
| MKL2    | CAV1    |
| LQT1    | G6PD    |

|         |          |
|---------|----------|
| AEACEI  | IL4      |
| CFC1    | EDNRA    |
| TMAU    | ADA      |
| NLSDM   | IL2      |
| CORD16  | PLA2G7   |
| WITKOS  | SYP      |
| CPPB1   | DRD2     |
| RLS1    | PTH      |
| FFS     | PRODH    |
| GCKR    | BSCL2    |
| HCCS    | ACP5     |
| CD40    | COL5A2   |
| TYMS    | F9       |
| SPRY1   | UMOD     |
| HEY1    | PSEN2    |
| CYP17A1 | TGFB3    |
| ARMS2   | APOA5    |
| CYP21A2 | SHH      |
| LEP     | AR       |
| SELENOS | CCND1    |
| ICAM1   | MIR155   |
| SINO    | LOX      |
| CFH     | CDH1     |
| IL11    | IL12B    |
| NDUFA2  | ATM      |
| BRIP1   | SELE     |
| LDLR    | HSPG2    |
| UQCRC2  | SERPINA3 |
| CCM2    | EDN3     |
| CHTD6   | ARSA     |
| ADRB1   | RBP4     |
| OI1     | HBA1     |
| PLA2G7  | CTSD     |
| PCSK9   | NTRK1    |
| IGHD4   | LPA      |
| PTGS2   | ITGB3    |
| ANKS6   | HTR2A    |
| AOS1    | COL4A1   |
| TBX2    | XDH      |
| MAP3K3  | HLA-DQB1 |
| APELA   | CYP11B2  |
| WHS     | LRP1     |
| MRLS    | CASP8    |
| HSCR1   | DYNC1H1  |
| CMD1M   | GATA6    |
| HDLQC6  | CCN2     |
| THCYT3  | SELP     |
| CMD1R   | TSHR     |
| LIDLS1  | CASR     |
| MVP1    | CRYAB    |
| CRH     | ADAM17   |
| FOLH1   | NDP      |

|          |           |
|----------|-----------|
| CD40LG   | MBL2      |
| DST      | TNFRSF11A |
| PDGFB    | SOX2      |
| NEDD4L   | BCHE      |
| CHRD     | ABCC8     |
| DBH      | TBX20     |
| ARID5A   | CEP290    |
| FOXO3A   | INSR      |
| MAS1     | PLAU      |
| NPHP3    | PROM1     |
| SCD      | IL17A     |
| VETD     | GH1       |
| FGA      | HMGCR     |
| NOTCH2   | ABCC9     |
| TGFBR1   | RUNX2     |
| SLC2A9   | HLA-DQA1  |
| POU1F1   | BMPR2     |
| MTCO1    | PON2      |
| EDN1     | HGF       |
| NGPS     | LTA       |
| DA9      | TLR3      |
| PWS      | PRKG1     |
| JAG1     | COL1A2    |
| VAV3     | BCL2      |
| THAS     | CYP17A1   |
| IGF1     | TG        |
| OLR1     | ESR2      |
| PITA1    | MEN1      |
| NODAL    | CD28      |
| B3GAT3   | LIPA      |
| HEG1     | BMP2      |
| AGOTC    | GLI3      |
| CLS      | FMR1      |
| LPHDST   | NOTCH3    |
| ARH      | TEK       |
| AOS2     | AIRE      |
| HSAN6    | PRKCSH    |
| CTRCT16  | MIR126    |
| NEDBEH   | KCNJ5     |
| VVS      | CRYAA     |
| FGF1     | MT-CO1    |
| NR3C2    | TRPM4     |
| AR       | PYGM      |
| CAPNS1   | CXCL12    |
| DYNLL1   | EMD       |
| GP1BA    | FLT4      |
| LIPG     | GP1BA     |
| NEK8     | SLC2A10   |
| CHTOP    |           |
| SCN1B    |           |
| SERPINE1 |           |
| ELOVL4   |           |

COL21A1  
MDDGB2  
FGB  
MAPK14  
ESX1L  
FBXW7  
ENPP1  
ATP5F1C  
APOB  
HGPS  
MYHRS  
IL10  
TNFRSF11B  
SLC2A10  
GJA1  
TTN  
OXT  
PTLS  
VCL  
WT1  
ITGB3  
ATORS  
FDH  
MOWS  
SQT1  
RAMSVPS  
HTX6  
CMH9  
SRTD15  
THPH9  
NPPC  
CAV1  
LAMA4  
GHRHR  
PTGIS  
NAT8  
GUCY1B2  
MIR145  
SLC16A9  
KAT6A  
CD36  
RETN  
ALDH2  
PDA1  
FGG  
FABP4  
INS  
HSD17B7  
MTTQ  
IRS1  
AOS5  
HLHS1



FLT4  
KLF5  
ALGS1  
DRD3  
GTF2I  
TMEM88  
PAFAD  
AGTR2  
ATE1  
PAPPA  
PITA4  
MCOPS1  
MKKS  
B12QTL1  
CHDS6  
OI13  
ARCL2C  
ARHI1  
GAS6  
CD47  
KCNMA1  
HOXA1  
ESS2  
TLL1  
USP16  
OTUD6B  
IFT140  
SEPT8  
PKD2  
UCN3  
ADRB2  
CETP  
MYH7  
KCNJ2  
F2  
EVC2  
UTS2  
PTGIR  
SGBS1  
JDSCD  
CPHD1  
ATFB13  
KCNJ4  
IL6R  
S1PR1  
MIR143  
PTGER1  
PIAS4  
CPS1  
CHRNA3  
NPY  
SDHA

SST  
TAC4  
EDSVASC  
COL4A1  
SKI  
SCARB1  
GLA  
PNPLA2















## **TwHF and CVD**

### **Common targets**

CYP19A1

G6PD

AR

HSD11B1

VDR

GABRA2

GABRB2

GABRG2

FABP4

PPARA

PPARD

FABP2

FFAR1

PLG

PRKCA

ALOX5AP

SHH

NR1H2

ESR1

ESR2

CA4

TRPV1

JAK2

AGTR1

HMGCR

GLRA1

KCNH2

KDR

HTR2B

MAPK14

F2R

PLA2G7

SLC6A2

APP

MAPK13

NR1H3

CYP17A1

CYP2C19

SLC6A4

BCHE

CHRM2

PTGER1

SQLE

NOS2

NR3C1

PPARG

DRD2

PTGIR

TERT

PTPN11

SCD  
CCR5  
PRKCB  
ALOX5  
PTGS2  
NR3C2  
PTGS1  
SLC6A3  
PRKCH  
IL6  
MMP3  
MMP1  
MMP2  
EDNRB  
EDNRA  
ITGB1  
MME  
ACE  
TNF  
ITGB3  
TYMS  
EPHB4  
EPHB6  
THRA  
MMP9  
XDH  
CA2  
CA7  
CA12  
CETP  
MAPT  
INSR  
MYLK  
SYK  
PIK3CG  
PIK3CA  
EGFR  
F2  
MPO  
CA1  
CA3  
CA6  
CA14  
CA9  
CSNK2A1  
CA5A  
KIT  
TNNT2  
TNNI3  
ECE1  
TP53  
TBXA2R

FLT1  
MTOR  
HTR2A  
RBP4  
TGFBFR1  
ABCB1  
CTSD  
REN  
CASP8  
ADAM17  
ADAM10  
CCND1  
DRD3  
STAT3  
ADRA1A  
HTR2C  
GBA  
ADK  
NTRK1  
BRAF  
ADRB1  
VHL  
LIPG  
GABRA5  
CASR  
MAPK1  
PSEN2  
PSEN1  
SCARB1  
BCL2  
AGTR2  
FGFR1  
PDGFRB  
PTPN22  
PLA2G2A  
NLRP3  
ABCC9  
F9  
BDKRB2  
TSHR  
LDLR  
GABRB3  
GABRA3  
GABRA1  
HLA-DRB1  
LIPA  
TRPV4  
KCNQ1  
HSD17B7  
CYP11B2  
FLT4  
LRRK2

ADRA1D  
IL1B  
LPL  
ELANE  
ALDH2  
CA5B  
FOLH1  
HRAS  
ALB  
SERPINE1  
NRP1  
KLK1  
RET  
ADRA2B  
CAPNS1  
ADRA1B  
AKT1  
ADRB2  
CX3CR1  
LIPC  
NR1I2  
CHRNA3  
CHRM1  
S1PR1
