# Supplementary material for: Exploring the Pharmacological Mechanisms of Tripterygium wilfordii Hook F against Cardiovascular Disease Using Network Pharmacology and Molecular Docking
Source: Hindawi journal article supplement (doi:10.1155/2021/5575621), 2021-01-01
Supplement: f1 [file 5575621.f1.zip]

| #node1 | node2  | node1_st | node2_st | node1_ex   | node2_ex   | neighbor | gene_fus | phylogen | homology |
|--------|--------|----------|----------|------------|------------|----------|----------|----------|----------|
| ACE    | REN    | 1847260  | 1846232  | 9606. ENSI | 9606. ENSI | 0        | 0        | 0        | 0        |
| ADAM17 | EGFR   | 1849242  | 1846445  | 9606. ENSI | 9606. ENSI | 0        | 0        | 0        | 0        |
| ADAM17 | ADAM10 | 1849242  | 1844789  | 9606. ENSI | 9606. ENSI | 0        | 0        | 0        | 0. 721   |
| ADAM17 | PRKCB  | 1849242  | 1848723  | 9606. ENSI | 9606. ENSI | 0        | 0        | 0        | 0        |
| ADRA1A | ADRA1B | 1857247  | 1848870  | 9606. ENSI | 9606. ENSI | 0        | 0        | 0        | 0. 946   |
| ADRA1A | ADRA1D | 1857247  | 1857034  | 9606. ENSI | 9606. ENSI | 0        | 0        | 0        | 0. 939   |
| ADRA1A | AGTR1  | 1857247  | 1846323  | 9606. ENSI | 9606. ENSI | 0        | 0        | 0        | 0. 65    |
| ADRA1A | CHRM1  | 1857247  | 1848849  | 9606. ENSI | 9606. ENSI | 0        | 0        | 0        | 0. 677   |
| ADRA1A | HTR2A  | 1857247  | 1856916  | 9606. ENSI | 9606. ENSI | 0        | 0        | 0        | 0. 728   |
| ADRA1A | HTR2B  | 1857247  | 1844597  | 9606. ENSI | 9606. ENSI | 0        | 0        | 0        | 0. 703   |
| ADRA1A | EDNRB  | 1857247  | 1856642  | 9606. ENSI | 9606. ENSI | 0        | 0        | 0        | 0. 628   |
| ADRA1A | PIK3CA | 1857247  | 1845446  | 9606. ENSI | 9606. ENSI | 0        | 0        | 0        | 0        |
| ADRA1A | EDNRA  | 1857247  | 1849748  | 9606. ENSI | 9606. ENSI | 0        | 0        | 0        | 0. 624   |
| ADRA1A | BDKRB2 | 1857247  | 1848988  | 9606. ENSI | 9606. ENSI | 0        | 0        | 0        | 0. 643   |
| ADRA1A | F2R    | 1857247  | 1850333  | 9606. ENSI | 9606. ENSI | 0        | 0        | 0        | 0. 623   |
| ADRA1A | PTGER1 | 1857247  | 1847360  | 9606. ENSI | 9606. ENSI | 0        | 0        | 0        | 0        |
| ADRA1A | APP    | 1857247  | 1846936  | 9606. ENSI | 9606. ENSI | 0        | 0        | 0        | 0        |
| ADRA1A | FFAR1  | 1857247  | 1843825  | 9606. ENSI | 9606. ENSI | 0        | 0        | 0        | 0        |
| ADRA1B | ADRB2  | 1848870  | 1848724  | 9606. ENSI | 9606. ENSI | 0        | 0        | 0        | 0. 818   |
| ADRA1B | APP    | 1848870  | 1846936  | 9606. ENSI | 9606. ENSI | 0        | 0        | 0        | 0        |
| ADRA1B | AGTR1  | 1848870  | 1846323  | 9606. ENSI | 9606. ENSI | 0        | 0        | 0        | 0. 636   |
| ADRA1B | HTR2B  | 1848870  | 1844597  | 9606. ENSI | 9606. ENSI | 0        | 0        | 0        | 0. 72    |
| ADRA1B | CCR5   | 1848870  | 1847342  | 9606. ENSI | 9606. ENSI | 0        | 0        | 0        | 0. 627   |
| ADRA1B | CHRM1  | 1848870  | 1848849  | 9606. ENSI | 9606. ENSI | 0        | 0        | 0        | 0. 671   |
| ADRA1B | PIK3CA | 1848870  | 1845446  | 9606. ENSI | 9606. ENSI | 0        | 0        | 0        | 0        |
| ADRA1B | HTR2C  | 1848870  | 1846478  | 9606. ENSI | 9606. ENSI | 0        | 0        | 0        | 0. 748   |
| ADRA1B | PTGER1 | 1848870  | 1847360  | 9606. ENSI | 9606. ENSI | 0        | 0        | 0        | 0        |
| ADRA1B | FFAR1  | 1848870  | 1843825  | 9606. ENSI | 9606. ENSI | 0        | 0        | 0        | 0        |
| ADRA1D | CHRM1  | 1857034  | 1848849  | 9606. ENSI | 9606. ENSI | 0        | 0        | 0        | 0. 683   |
| ADRA1D | HTR2B  | 1857034  | 1844597  | 9606. ENSI | 9606. ENSI | 0        | 0        | 0        | 0. 701   |
| ADRA1D | AGTR1  | 1857034  | 1846323  | 9606. ENSI | 9606. ENSI | 0        | 0        | 0        | 0. 643   |
| ADRA1D | HTR2A  | 1857034  | 1856916  | 9606. ENSI | 9606. ENSI | 0        | 0        | 0        | 0. 724   |
| ADRA1D | EDNRA  | 1857034  | 1849748  | 9606. ENSI | 9606. ENSI | 0        | 0        | 0        | 0        |
| ADRA1D | ADRA1B | 1857034  | 1848870  | 9606. ENSI | 9606. ENSI | 0        | 0        | 0        | 0. 935   |
| ADRA1D | F2R    | 1857034  | 1850333  | 9606. ENSI | 9606. ENSI | 0        | 0        | 0        | 0        |
| ADRA1D | EDNRB  | 1857034  | 1856642  | 9606. ENSI | 9606. ENSI | 0        | 0        | 0        | 0. 622   |
| ADRA1D | PIK3CA | 1857034  | 1845446  | 9606. ENSI | 9606. ENSI | 0        | 0        | 0        | 0        |
| ADRA1D | APP    | 1857034  | 1846936  | 9606. ENSI | 9606. ENSI | 0        | 0        | 0        | 0        |
| ADRA1D | BDKRB2 | 1857034  | 1848988  | 9606. ENSI | 9606. ENSI | 0        | 0        | 0        | 0. 63    |
| ADRA1D | FFAR1  | 1857034  | 1843825  | 9606. ENSI | 9606. ENSI | 0        | 0        | 0        | 0        |
| ADRA1D | PTGER1 | 1857034  | 1847360  | 9606. ENSI | 9606. ENSI | 0        | 0        | 0        | 0        |
| ADRA2B | CHRM2  | 1859258  | 1850196  | 9606. ENSI | 9606. ENSI | 0        | 0        | 0        | 0. 705   |
| ADRA2B | DRD2   | 1859258  | 1854237  | 9606. ENSI | 9606. ENSI | 0        | 0        | 0        | 0. 81    |
| ADRA2B | DRD3   | 1859258  | 1857726  | 9606. ENSI | 9606. ENSI | 0        | 0        | 0        | 0. 727   |
| ADRA2B | S1PR1  | 1859258  | 1848727  | 9606. ENSI | 9606. ENSI | 0        | 0        | 0        | 0. 626   |
| ADRA2B | APP    | 1859258  | 1846936  | 9606. ENSI | 9606. ENSI | 0        | 0        | 0        | 0        |
| ADRA2B | BDKRB2 | 1859258  | 1848988  | 9606. ENSI | 9606. ENSI | 0        | 0        | 0        | 0        |
| ADRA2B | CCR5   | 1859258  | 1847342  | 9606. ENSI | 9606. ENSI | 0        | 0        | 0        | 0. 631   |
| ADRB1  | ADRB2  | 1854995  | 1848724  | 9606. ENSI | 9606. ENSI | 0        | 0        | 0        | 0. 946   |
| ADRB1  | TSHR   | 1854995  | 1847934  | 9606. ENSI | 9606. ENSI | 0        | 0        | 0        | 0        |
| ADRB1  | PTGIR  | 1854995  | 1847278  | 9606. ENSI | 9606. ENSI | 0        | 0        | 0        | 0        |
| ADRB2  | PTGER1 | 1848724  | 1847360  | 9606. ENSI | 9606. ENSI | 0        | 0        | 0        | 0        |
| ADRB2  | TSHR   | 1848724  | 1847934  | 9606. ENSI | 9606. ENSI | 0        | 0        | 0        | 0        |

|         |          |         |         |                      |   |   |        |        |
|---------|----------|---------|---------|----------------------|---|---|--------|--------|
| ADRB2   | VHL      | 1848724 | 1844441 | 9606. ENSI9606. ENSI | 0 | 0 | 0      | 0      |
| ADRB2   | CCR5     | 1848724 | 1847342 | 9606. ENSI9606. ENSI | 0 | 0 | 0      | 0. 636 |
| ADRB2   | HTR2C    | 1848724 | 1846478 | 9606. ENSI9606. ENSI | 0 | 0 | 0      | 0. 726 |
| ADRB2   | PTGIR    | 1848724 | 1847278 | 9606. ENSI9606. ENSI | 0 | 0 | 0      | 0      |
| AGTR1   | HTR2B    | 1846323 | 1844597 | 9606. ENSI9606. ENSI | 0 | 0 | 0      | 0. 649 |
| AGTR1   | PIK3CA   | 1846323 | 1845446 | 9606. ENSI9606. ENSI | 0 | 0 | 0      | 0      |
| AGTR1   | FFAR1    | 1846323 | 1843825 | 9606. ENSI9606. ENSI | 0 | 0 | 0      | 0      |
| AKT1    | PIK3CA   | 1846136 | 1845446 | 9606. ENSI9606. ENSI | 0 | 0 | 0      | 0      |
| AKT1    | ESR1     | 1846136 | 1842435 | 9606. ENSI9606. ENSI | 0 | 0 | 0      | 0      |
| AKT1    | RAF1     | 1846136 | 1844086 | 9606. ENSI9606. ENSI | 0 | 0 | 0      | 0. 635 |
| AKT1    | RPS6KB1  | 1846136 | 1843035 | 9606. ENSI9606. ENSI | 0 | 0 | 0. 432 | 0. 87  |
| AKT1    | CCND1    | 1846136 | 1843117 | 9606. ENSI9606. ENSI | 0 | 0 | 0      | 0      |
| AKT1    | TP53     | 1846136 | 1846083 | 9606. ENSI9606. ENSI | 0 | 0 | 0      | 0      |
| AKT1    | STAT3    | 1846136 | 1845584 | 9606. ENSI9606. ENSI | 0 | 0 | 0      | 0      |
| AKT1    | ITGB3    | 1846136 | 1845040 | 9606. ENSI9606. ENSI | 0 | 0 | 0      | 0      |
| AKT1    | MAPK14   | 1846136 | 1843222 | 9606. ENSI9606. ENSI | 0 | 0 | 0      | 0. 67  |
| AKT1    | IL6      | 1846136 | 1844631 | 9606. ENSI9606. ENSI | 0 | 0 | 0      | 0      |
| AKT1    | MMP2     | 1846136 | 1842719 | 9606. ENSI9606. ENSI | 0 | 0 | 0      | 0      |
| AKT1    | PDGFRB   | 1846136 | 1844996 | 9606. ENSI9606. ENSI | 0 | 0 | 0      | 0. 617 |
| AKT1    | SERPINE1 | 1846136 | 1842959 | 9606. ENSI9606. ENSI | 0 | 0 | 0      | 0      |
| ALB     | SERPINE1 | 1847637 | 1842959 | 9606. ENSI9606. ENSI | 0 | 0 | 0      | 0      |
| ALB     | TP53     | 1847637 | 1846083 | 9606. ENSI9606. ENSI | 0 | 0 | 0      | 0      |
| ALB     | APP      | 1847637 | 1846936 | 9606. ENSI9606. ENSI | 0 | 0 | 0      | 0      |
| ALB     | KDR      | 1847637 | 1845437 | 9606. ENSI9606. ENSI | 0 | 0 | 0      | 0      |
| ALB     | CTSD     | 1847637 | 1843439 | 9606. ENSI9606. ENSI | 0 | 0 | 0      | 0      |
| ALOX5   | PTGS2    | 1856107 | 1854602 | 9606. ENSI9606. ENSI | 0 | 0 | 0      | 0      |
| ALOX5AP | ALOX5    | 1857231 | 1856107 | 9606. ENSI9606. ENSI | 0 | 0 | 0      | 0      |
| APP     | ADAM10   | 1846936 | 1844789 | 9606. ENSI9606. ENSI | 0 | 0 | 0      | 0      |
| APP     | MAPK1    | 1846936 | 1842512 | 9606. ENSI9606. ENSI | 0 | 0 | 0      | 0      |
| APP     | F9       | 1846936 | 1842692 | 9606. ENSI9606. ENSI | 0 | 0 | 0      | 0      |
| APP     | SERPINE1 | 1846936 | 1842959 | 9606. ENSI9606. ENSI | 0 | 0 | 0      | 0      |
| APP     | AGTR1    | 1846936 | 1846323 | 9606. ENSI9606. ENSI | 0 | 0 | 0      | 0      |
| APP     | PIK3CA   | 1846936 | 1845446 | 9606. ENSI9606. ENSI | 0 | 0 | 0      | 0      |
| APP     | HTR2B    | 1846936 | 1844597 | 9606. ENSI9606. ENSI | 0 | 0 | 0      | 0      |
| APP     | FFAR1    | 1846936 | 1843825 | 9606. ENSI9606. ENSI | 0 | 0 | 0      | 0      |
| AR      | CCND1    | 1856164 | 1843117 | 9606. ENSI9606. ENSI | 0 | 0 | 0      | 0      |
| AR      | EGFR     | 1856164 | 1846445 | 9606. ENSI9606. ENSI | 0 | 0 | 0      | 0      |
| AR      | AKT1     | 1856164 | 1846136 | 9606. ENSI9606. ENSI | 0 | 0 | 0      | 0      |
| AR      | STAT3    | 1856164 | 1845584 | 9606. ENSI9606. ENSI | 0 | 0 | 0      | 0      |
| AR      | CDK6     | 1856164 | 1845799 | 9606. ENSI9606. ENSI | 0 | 0 | 0      | 0      |
| AR      | TP53     | 1856164 | 1846083 | 9606. ENSI9606. ENSI | 0 | 0 | 0      | 0      |
| AR      | ESR1     | 1856164 | 1842435 | 9606. ENSI9606. ENSI | 0 | 0 | 0      | 0. 692 |
| AR      | CASP8    | 1856164 | 1853692 | 9606. ENSI9606. ENSI | 0 | 0 | 0      | 0      |
| AR      | NR3C1    | 1856164 | 1843294 | 9606. ENSI9606. ENSI | 0 | 0 | 0      | 0. 825 |
| AR      | HRAS     | 1856164 | 1849235 | 9606. ENSI9606. ENSI | 0 | 0 | 0      | 0      |
| AR      | PIK3CA   | 1856164 | 1845446 | 9606. ENSI9606. ENSI | 0 | 0 | 0      | 0      |
| AR      | MAPK14   | 1856164 | 1843222 | 9606. ENSI9606. ENSI | 0 | 0 | 0      | 0      |
| AR      | IL6      | 1856164 | 1844631 | 9606. ENSI9606. ENSI | 0 | 0 | 0      | 0      |
| AR      | ESR2     | 1856164 | 1852756 | 9606. ENSI9606. ENSI | 0 | 0 | 0      | 0. 707 |
| AR      | PPARG    | 1856164 | 1847090 | 9606. ENSI9606. ENSI | 0 | 0 | 0      | 0. 626 |
| AR      | PPARA    | 1856164 | 1845205 | 9606. ENSI9606. ENSI | 0 | 0 | 0      | 0. 638 |
| AR      | THRA     | 1856164 | 1845577 | 9606. ENSI9606. ENSI | 0 | 0 | 0      | 0. 635 |
| AR      | PPARD    | 1856164 | 1849364 | 9606. ENSI9606. ENSI | 0 | 0 | 0      | 0. 629 |
| AR      | NR1H2    | 1856164 | 1844246 | 9606. ENSI9606. ENSI | 0 | 0 | 0      | 0. 641 |

|        |        |         |         |            |            |   |   |   |        |
|--------|--------|---------|---------|------------|------------|---|---|---|--------|
| BCL2   | RAF1   | 1851168 | 1844086 | 9606. ENSI | 9606. ENSI | 0 | 0 | 0 | 0      |
| BCL2   | TP53   | 1851168 | 1846083 | 9606. ENSI | 9606. ENSI | 0 | 0 | 0 | 0      |
| BCL2   | AKT1   | 1851168 | 1846136 | 9606. ENSI | 9606. ENSI | 0 | 0 | 0 | 0      |
| BCL2   | MAPK1  | 1851168 | 1842512 | 9606. ENSI | 9606. ENSI | 0 | 0 | 0 | 0      |
| BCL2   | IRS1   | 1851168 | 1848682 | 9606. ENSI | 9606. ENSI | 0 | 0 | 0 | 0      |
| BCL2   | CCND1  | 1851168 | 1843117 | 9606. ENSI | 9606. ENSI | 0 | 0 | 0 | 0      |
| BCL2   | HRAS   | 1851168 | 1849235 | 9606. ENSI | 9606. ENSI | 0 | 0 | 0 | 0      |
| BCL2   | MAPK14 | 1851168 | 1843222 | 9606. ENSI | 9606. ENSI | 0 | 0 | 0 | 0      |
| BCL2   | PSEN1  | 1851168 | 1850825 | 9606. ENSI | 9606. ENSI | 0 | 0 | 0 | 0      |
| BCL2   | ALB    | 1851168 | 1847637 | 9606. ENSI | 9606. ENSI | 0 | 0 | 0 | 0      |
| BCL2   | IL6    | 1851168 | 1844631 | 9606. ENSI | 9606. ENSI | 0 | 0 | 0 | 0      |
| BCL2   | MMP2   | 1851168 | 1842719 | 9606. ENSI | 9606. ENSI | 0 | 0 | 0 | 0      |
| BDKRB2 | AGTR1  | 1848988 | 1846323 | 9606. ENSI | 9606. ENSI | 0 | 0 | 0 | 0. 808 |
| BDKRB2 | CHRM1  | 1848988 | 1848849 | 9606. ENSI | 9606. ENSI | 0 | 0 | 0 | 0      |
| BDKRB2 | PTGER1 | 1848988 | 1847360 | 9606. ENSI | 9606. ENSI | 0 | 0 | 0 | 0      |
| BDKRB2 | TP53   | 1848988 | 1846083 | 9606. ENSI | 9606. ENSI | 0 | 0 | 0 | 0      |
| BDKRB2 | CCR5   | 1848988 | 1847342 | 9606. ENSI | 9606. ENSI | 0 | 0 | 0 | 0. 735 |
| BDKRB2 | PIK3CA | 1848988 | 1845446 | 9606. ENSI | 9606. ENSI | 0 | 0 | 0 | 0      |
| BDKRB2 | FFAR1  | 1848988 | 1843825 | 9606. ENSI | 9606. ENSI | 0 | 0 | 0 | 0      |
| BDKRB2 | APP    | 1848988 | 1846936 | 9606. ENSI | 9606. ENSI | 0 | 0 | 0 | 0      |
| BDKRB2 | HTR2B  | 1848988 | 1844597 | 9606. ENSI | 9606. ENSI | 0 | 0 | 0 | 0. 624 |
| BDKRB2 | S1PR1  | 1848988 | 1848727 | 9606. ENSI | 9606. ENSI | 0 | 0 | 0 | 0      |
| BDKRB2 | ADRA1B | 1848988 | 1848870 | 9606. ENSI | 9606. ENSI | 0 | 0 | 0 | 0. 645 |
| BRAF   | RAF1   | 1847131 | 1844086 | 9606. ENSI | 9606. ENSI | 0 | 0 | 0 | 0. 958 |
| BRAF   | MAPK1  | 1847131 | 1842512 | 9606. ENSI | 9606. ENSI | 0 | 0 | 0 | 0. 637 |
| BRAF   | AKT1   | 1847131 | 1846136 | 9606. ENSI | 9606. ENSI | 0 | 0 | 0 | 0. 637 |
| CAPNS1 | MAPK1  | 1843820 | 1842512 | 9606. ENSI | 9606. ENSI | 0 | 0 | 0 | 0      |
| CASP8  | BCL2   | 1853692 | 1851168 | 9606. ENSI | 9606. ENSI | 0 | 0 | 0 | 0      |
| CASP8  | MAPK1  | 1853692 | 1842512 | 9606. ENSI | 9606. ENSI | 0 | 0 | 0 | 0      |
| CASP8  | APP    | 1853692 | 1846936 | 9606. ENSI | 9606. ENSI | 0 | 0 | 0 | 0      |
| CASP8  | TP53   | 1853692 | 1846083 | 9606. ENSI | 9606. ENSI | 0 | 0 | 0 | 0      |
| CASP8  | ITGB3  | 1853692 | 1845040 | 9606. ENSI | 9606. ENSI | 0 | 0 | 0 | 0      |
| CASR   | APP    | 1861464 | 1846936 | 9606. ENSI | 9606. ENSI | 0 | 0 | 0 | 0      |
| CASR   | EDNRB  | 1861464 | 1856642 | 9606. ENSI | 9606. ENSI | 0 | 0 | 0 | 0      |
| CASR   | AGTR1  | 1861464 | 1846323 | 9606. ENSI | 9606. ENSI | 0 | 0 | 0 | 0      |
| CASR   | CCR5   | 1861464 | 1847342 | 9606. ENSI | 9606. ENSI | 0 | 0 | 0 | 0      |
| CASR   | F2R    | 1861464 | 1850333 | 9606. ENSI | 9606. ENSI | 0 | 0 | 0 | 0      |
| CASR   | DRD2   | 1861464 | 1854237 | 9606. ENSI | 9606. ENSI | 0 | 0 | 0 | 0      |
| CASR   | CHRM2  | 1861464 | 1850196 | 9606. ENSI | 9606. ENSI | 0 | 0 | 0 | 0      |
| CASR   | CHRM1  | 1861464 | 1848849 | 9606. ENSI | 9606. ENSI | 0 | 0 | 0 | 0      |
| CASR   | EDNRA  | 1861464 | 1849748 | 9606. ENSI | 9606. ENSI | 0 | 0 | 0 | 0      |
| CASR   | TBXA2R | 1861464 | 1859713 | 9606. ENSI | 9606. ENSI | 0 | 0 | 0 | 0      |
| CASR   | ADRA1B | 1861464 | 1848870 | 9606. ENSI | 9606. ENSI | 0 | 0 | 0 | 0      |
| CASR   | FFAR1  | 1861464 | 1843825 | 9606. ENSI | 9606. ENSI | 0 | 0 | 0 | 0      |
| CASR   | PIK3CA | 1861464 | 1845446 | 9606. ENSI | 9606. ENSI | 0 | 0 | 0 | 0      |
| CASR   | HTR2B  | 1861464 | 1844597 | 9606. ENSI | 9606. ENSI | 0 | 0 | 0 | 0      |
| CASR   | ADRA1D | 1861464 | 1857034 | 9606. ENSI | 9606. ENSI | 0 | 0 | 0 | 0      |
| CASR   | HTR2A  | 1861464 | 1856916 | 9606. ENSI | 9606. ENSI | 0 | 0 | 0 | 0      |
| CASR   | ADRA1A | 1861464 | 1857247 | 9606. ENSI | 9606. ENSI | 0 | 0 | 0 | 0      |
| CASR   | DRD3   | 1861464 | 1857726 | 9606. ENSI | 9606. ENSI | 0 | 0 | 0 | 0      |
| CASR   | PTGER1 | 1861464 | 1847360 | 9606. ENSI | 9606. ENSI | 0 | 0 | 0 | 0      |
| CASR   | ADRA2B | 1861464 | 1859258 | 9606. ENSI | 9606. ENSI | 0 | 0 | 0 | 0      |
| CASR   | S1PR1  | 1861464 | 1848727 | 9606. ENSI | 9606. ENSI | 0 | 0 | 0 | 0      |
| CASR   | BDKRB2 | 1861464 | 1848988 | 9606. ENSI | 9606. ENSI | 0 | 0 | 0 | 0      |

|         |         |         |         |                      |   |   |        |        |
|---------|---------|---------|---------|----------------------|---|---|--------|--------|
| CCND1   | ESR1    | 1843117 | 1842435 | 9606. ENSI9606. ENSI | 0 | 0 | 0      | 0      |
| CCND1   | MAPK1   | 1843117 | 1842512 | 9606. ENSI9606. ENSI | 0 | 0 | 0      | 0      |
| CCR5    | STAT3   | 1847342 | 1845584 | 9606. ENSI9606. ENSI | 0 | 0 | 0      | 0      |
| CCR5    | APP     | 1847342 | 1846936 | 9606. ENSI9606. ENSI | 0 | 0 | 0      | 0      |
| CCR5    | HTR2C   | 1847342 | 1846478 | 9606. ENSI9606. ENSI | 0 | 0 | 0      | 0      |
| CDK4    | CCND1   | 1844551 | 1843117 | 9606. ENSI9606. ENSI | 0 | 0 | 0      | 0      |
| CDK4    | FABP4   | 1844551 | 1844407 | 9606. ENSI9606. ENSI | 0 | 0 | 0      | 0      |
| CDK6    | CCND1   | 1845799 | 1843117 | 9606. ENSI9606. ENSI | 0 | 0 | 0      | 0      |
| CDK6    | CDK4    | 1845799 | 1844551 | 9606. ENSI9606. ENSI | 0 | 0 | 0. 526 | 0. 977 |
| CHRM1   | APP     | 1848849 | 1846936 | 9606. ENSI9606. ENSI | 0 | 0 | 0      | 0      |
| CHRM1   | ADRB2   | 1848849 | 1848724 | 9606. ENSI9606. ENSI | 0 | 0 | 0      | 0. 7   |
| CHRM1   | FFAR1   | 1848849 | 1843825 | 9606. ENSI9606. ENSI | 0 | 0 | 0      | 0      |
| CHRM1   | PIK3CA  | 1848849 | 1845446 | 9606. ENSI9606. ENSI | 0 | 0 | 0      | 0      |
| CHRM1   | AGTR1   | 1848849 | 1846323 | 9606. ENSI9606. ENSI | 0 | 0 | 0      | 0. 636 |
| CHRM1   | HTR2B   | 1848849 | 1844597 | 9606. ENSI9606. ENSI | 0 | 0 | 0      | 0. 645 |
| CHRM1   | HTR2C   | 1848849 | 1846478 | 9606. ENSI9606. ENSI | 0 | 0 | 0      | 0. 66  |
| CHRM1   | CCR5    | 1848849 | 1847342 | 9606. ENSI9606. ENSI | 0 | 0 | 0      | 0      |
| CHRM1   | PTGER1  | 1848849 | 1847360 | 9606. ENSI9606. ENSI | 0 | 0 | 0      | 0      |
| CHRM1   | ITGB1   | 1848849 | 1848520 | 9606. ENSI9606. ENSI | 0 | 0 | 0      | 0      |
| CHRM2   | APP     | 1850196 | 1846936 | 9606. ENSI9606. ENSI | 0 | 0 | 0      | 0      |
| CHRM2   | S1PR1   | 1850196 | 1848727 | 9606. ENSI9606. ENSI | 0 | 0 | 0      | 0. 624 |
| CHRM2   | CCR5    | 1850196 | 1847342 | 9606. ENSI9606. ENSI | 0 | 0 | 0      | 0      |
| CHRM2   | BDKRB2  | 1850196 | 1848988 | 9606. ENSI9606. ENSI | 0 | 0 | 0      | 0      |
| CTSD    | ESR1    | 1843439 | 1842435 | 9606. ENSI9606. ENSI | 0 | 0 | 0      | 0      |
| CYP11B2 | HSD11B1 | 1850775 | 1844918 | 9606. ENSI9606. ENSI | 0 | 0 | 0      | 0      |
| CYP11B2 | CYP19A1 | 1850775 | 1844790 | 9606. ENSI9606. ENSI | 0 | 0 | 0      | 0. 623 |
| CYP17A1 | ESR1    | 1855129 | 1842435 | 9606. ENSI9606. ENSI | 0 | 0 | 0      | 0      |
| CYP17A1 | CYP19A1 | 1855129 | 1844790 | 9606. ENSI9606. ENSI | 0 | 0 | 0. 526 | 0. 63  |
| CYP17A1 | CYP11B2 | 1855129 | 1850775 | 9606. ENSI9606. ENSI | 0 | 0 | 0      | 0. 626 |
| CYP17A1 | ESR2    | 1855129 | 1852756 | 9606. ENSI9606. ENSI | 0 | 0 | 0      | 0      |
| CYP19A1 | HSD17B7 | 1844790 | 1844300 | 9606. ENSI9606. ENSI | 0 | 0 | 0      | 0      |
| CYP19A1 | ESR1    | 1844790 | 1842435 | 9606. ENSI9606. ENSI | 0 | 0 | 0      | 0      |
| CYP2C19 | PTGS2   | 1855462 | 1854602 | 9606. ENSI9606. ENSI | 0 | 0 | 0      | 0      |
| CYP2C19 | NR1I2   | 1855462 | 1851892 | 9606. ENSI9606. ENSI | 0 | 0 | 0      | 0      |
| CYP2C19 | PTGS1   | 1855462 | 1854170 | 9606. ENSI9606. ENSI | 0 | 0 | 0      | 0      |
| DRD2    | SLC6A3  | 1854237 | 1846148 | 9606. ENSI9606. ENSI | 0 | 0 | 0      | 0      |
| DRD2    | CHRM2   | 1854237 | 1850196 | 9606. ENSI9606. ENSI | 0 | 0 | 0      | 0. 717 |
| DRD2    | CCR5    | 1854237 | 1847342 | 9606. ENSI9606. ENSI | 0 | 0 | 0      | 0      |
| DRD2    | APP     | 1854237 | 1846936 | 9606. ENSI9606. ENSI | 0 | 0 | 0      | 0      |
| DRD2    | BDKRB2  | 1854237 | 1848988 | 9606. ENSI9606. ENSI | 0 | 0 | 0      | 0. 625 |
| DRD2    | S1PR1   | 1854237 | 1848727 | 9606. ENSI9606. ENSI | 0 | 0 | 0      | 0. 644 |
| DRD3    | CHRM2   | 1857726 | 1850196 | 9606. ENSI9606. ENSI | 0 | 0 | 0      | 0. 71  |
| DRD3    | S1PR1   | 1857726 | 1848727 | 9606. ENSI9606. ENSI | 0 | 0 | 0      | 0. 632 |
| DRD3    | DRD2    | 1857726 | 1854237 | 9606. ENSI9606. ENSI | 0 | 0 | 0      | 0. 947 |
| DRD3    | APP     | 1857726 | 1846936 | 9606. ENSI9606. ENSI | 0 | 0 | 0      | 0      |
| DRD3    | BDKRB2  | 1857726 | 1848988 | 9606. ENSI9606. ENSI | 0 | 0 | 0      | 0      |
| DRD3    | CCR5    | 1857726 | 1847342 | 9606. ENSI9606. ENSI | 0 | 0 | 0      | 0      |
| EDNRA   | AKT1    | 1849748 | 1846136 | 9606. ENSI9606. ENSI | 0 | 0 | 0      | 0      |
| EDNRA   | EGFR    | 1849748 | 1846445 | 9606. ENSI9606. ENSI | 0 | 0 | 0      | 0      |
| EDNRA   | APP     | 1849748 | 1846936 | 9606. ENSI9606. ENSI | 0 | 0 | 0      | 0      |
| EDNRA   | AGTR1   | 1849748 | 1846323 | 9606. ENSI9606. ENSI | 0 | 0 | 0      | 0. 653 |
| EDNRA   | PTGER1  | 1849748 | 1847360 | 9606. ENSI9606. ENSI | 0 | 0 | 0      | 0      |
| EDNRA   | BDKRB2  | 1849748 | 1848988 | 9606. ENSI9606. ENSI | 0 | 0 | 0      | 0. 627 |
| EDNRA   | HTR2B   | 1849748 | 1844597 | 9606. ENSI9606. ENSI | 0 | 0 | 0      | 0. 62  |

|          |          |         |         |                      |        |   |   |        |
|----------|----------|---------|---------|----------------------|--------|---|---|--------|
| EDNRA    | CHRM1    | 1849748 | 1848849 | 9606. ENSI9606. ENSI | 0      | 0 | 0 | 0      |
| EDNRA    | ADRA1B   | 1849748 | 1848870 | 9606. ENSI9606. ENSI | 0      | 0 | 0 | 0. 625 |
| EDNRA    | FFAR1    | 1849748 | 1843825 | 9606. ENSI9606. ENSI | 0      | 0 | 0 | 0      |
| EDNRA    | PIK3CA   | 1849748 | 1845446 | 9606. ENSI9606. ENSI | 0      | 0 | 0 | 0      |
| EDNRB    | MAPK14   | 1856642 | 1843222 | 9606. ENSI9606. ENSI | 0      | 0 | 0 | 0      |
| EDNRB    | AGTR1    | 1856642 | 1846323 | 9606. ENSI9606. ENSI | 0      | 0 | 0 | 0. 662 |
| EDNRB    | HTR2B    | 1856642 | 1844597 | 9606. ENSI9606. ENSI | 0      | 0 | 0 | 0. 621 |
| EDNRB    | APP      | 1856642 | 1846936 | 9606. ENSI9606. ENSI | 0      | 0 | 0 | 0      |
| EDNRB    | F2R      | 1856642 | 1850333 | 9606. ENSI9606. ENSI | 0      | 0 | 0 | 0. 626 |
| EDNRB    | BDKRB2   | 1856642 | 1848988 | 9606. ENSI9606. ENSI | 0      | 0 | 0 | 0. 646 |
| EDNRB    | PTGER1   | 1856642 | 1847360 | 9606. ENSI9606. ENSI | 0      | 0 | 0 | 0      |
| EDNRB    | EDNRA    | 1856642 | 1849748 | 9606. ENSI9606. ENSI | 0      | 0 | 0 | 0. 957 |
| EDNRB    | ADRA1B   | 1856642 | 1848870 | 9606. ENSI9606. ENSI | 0      | 0 | 0 | 0. 624 |
| EDNRB    | CHRM1    | 1856642 | 1848849 | 9606. ENSI9606. ENSI | 0      | 0 | 0 | 0      |
| EDNRB    | PIK3CA   | 1856642 | 1845446 | 9606. ENSI9606. ENSI | 0      | 0 | 0 | 0      |
| EDNRB    | FFAR1    | 1856642 | 1843825 | 9606. ENSI9606. ENSI | 0      | 0 | 0 | 0      |
| EGFR     | STAT3    | 1846445 | 1845584 | 9606. ENSI9606. ENSI | 0      | 0 | 0 | 0      |
| EGFR     | TP53     | 1846445 | 1846083 | 9606. ENSI9606. ENSI | 0      | 0 | 0 | 0      |
| EGFR     | ESR1     | 1846445 | 1842435 | 9606. ENSI9606. ENSI | 0      | 0 | 0 | 0      |
| EGFR     | PIK3CA   | 1846445 | 1845446 | 9606. ENSI9606. ENSI | 0      | 0 | 0 | 0      |
| EGFR     | MAPK1    | 1846445 | 1842512 | 9606. ENSI9606. ENSI | 0      | 0 | 0 | 0. 632 |
| EGFR     | CCND1    | 1846445 | 1843117 | 9606. ENSI9606. ENSI | 0      | 0 | 0 | 0      |
| EGFR     | ADAM10   | 1846445 | 1844789 | 9606. ENSI9606. ENSI | 0      | 0 | 0 | 0      |
| EGFR     | IL6      | 1846445 | 1844631 | 9606. ENSI9606. ENSI | 0      | 0 | 0 | 0      |
| EGFR     | MAPK14   | 1846445 | 1843222 | 9606. ENSI9606. ENSI | 0      | 0 | 0 | 0. 632 |
| EGFR     | PPARA    | 1846445 | 1845205 | 9606. ENSI9606. ENSI | 0      | 0 | 0 | 0      |
| EIF4EBP1 | AKT1     | 1852358 | 1846136 | 9606. ENSI9606. ENSI | 0      | 0 | 0 | 0      |
| EIF4EBP1 | RPTOR    | 1852358 | 1848942 | 9606. ENSI9606. ENSI | 0      | 0 | 0 | 0      |
| EIF4EBP1 | LRRK2    | 1852358 | 1848005 | 9606. ENSI9606. ENSI | 0      | 0 | 0 | 0      |
| EIF4EBP1 | RPS6KB1  | 1852358 | 1843035 | 9606. ENSI9606. ENSI | 0      | 0 | 0 | 0      |
| EIF4EBP1 | MAPK1    | 1852358 | 1842512 | 9606. ENSI9606. ENSI | 0      | 0 | 0 | 0      |
| EIF4EBP1 | MAPK14   | 1852358 | 1843222 | 9606. ENSI9606. ENSI | 0      | 0 | 0 | 0      |
| EIF4EBP1 | CCND1    | 1852358 | 1843117 | 9606. ENSI9606. ENSI | 0      | 0 | 0 | 0      |
| EIF4EBP1 | PIK3CA   | 1852358 | 1845446 | 9606. ENSI9606. ENSI | 0      | 0 | 0 | 0      |
| ELANE    | MMP2     | 1845377 | 1842719 | 9606. ENSI9606. ENSI | 0      | 0 | 0 | 0      |
| EPHB4    | PIK3CA   | 1853646 | 1845446 | 9606. ENSI9606. ENSI | 0      | 0 | 0 | 0      |
| ESR2     | ESR1     | 1852756 | 1842435 | 9606. ENSI9606. ENSI | 0      | 0 | 0 | 0. 935 |
| ESR2     | PPARG    | 1852756 | 1847090 | 9606. ENSI9606. ENSI | 0      | 0 | 0 | 0. 636 |
| ESR2     | MAPK1    | 1852756 | 1842512 | 9606. ENSI9606. ENSI | 0      | 0 | 0 | 0      |
| ESR2     | THRA     | 1852756 | 1845577 | 9606. ENSI9606. ENSI | 0      | 0 | 0 | 0. 663 |
| ESR2     | PPARA    | 1852756 | 1845205 | 9606. ENSI9606. ENSI | 0      | 0 | 0 | 0. 642 |
| ESR2     | PPARD    | 1852756 | 1849364 | 9606. ENSI9606. ENSI | 0      | 0 | 0 | 0. 637 |
| ESR2     | NR1H2    | 1852756 | 1844246 | 9606. ENSI9606. ENSI | 0      | 0 | 0 | 0. 684 |
| F2       | SERPINE1 | 1849080 | 1842959 | 9606. ENSI9606. ENSI | 0. 083 | 0 | 0 | 0      |
| F2       | F9       | 1849080 | 1842692 | 9606. ENSI9606. ENSI | 0      | 0 | 0 | 0. 739 |
| F2       | MAPK1    | 1849080 | 1842512 | 9606. ENSI9606. ENSI | 0      | 0 | 0 | 0      |
| F2       | PPARA    | 1849080 | 1845205 | 9606. ENSI9606. ENSI | 0      | 0 | 0 | 0      |
| F2       | RAF1     | 1849080 | 1844086 | 9606. ENSI9606. ENSI | 0      | 0 | 0 | 0      |
| F2       | ESR1     | 1849080 | 1842435 | 9606. ENSI9606. ENSI | 0      | 0 | 0 | 0      |
| F2       | AKT1     | 1849080 | 1846136 | 9606. ENSI9606. ENSI | 0      | 0 | 0 | 0      |
| F2       | CCR5     | 1849080 | 1847342 | 9606. ENSI9606. ENSI | 0      | 0 | 0 | 0      |
| F2       | HTR2C    | 1849080 | 1846478 | 9606. ENSI9606. ENSI | 0      | 0 | 0 | 0      |
| F2       | EGFR     | 1849080 | 1846445 | 9606. ENSI9606. ENSI | 0      | 0 | 0 | 0      |
| F2       | PTGER1   | 1849080 | 1847360 | 9606. ENSI9606. ENSI | 0      | 0 | 0 | 0      |

|          |        |         |         |                      |   |   |   |        |
|----------|--------|---------|---------|----------------------|---|---|---|--------|
| F2       | ADRB2  | 1849080 | 1848724 | 9606. ENSI9606. ENSI | 0 | 0 | 0 | 0      |
| F2       | CHRM1  | 1849080 | 1848849 | 9606. ENSI9606. ENSI | 0 | 0 | 0 | 0      |
| F2       | ADRA1B | 1849080 | 1848870 | 9606. ENSI9606. ENSI | 0 | 0 | 0 | 0      |
| F2R      | F2     | 1850333 | 1849080 | 9606. ENSI9606. ENSI | 0 | 0 | 0 | 0      |
| F2R      | PLG    | 1850333 | 1849130 | 9606. ENSI9606. ENSI | 0 | 0 | 0 | 0      |
| F2R      | EDNRA  | 1850333 | 1849748 | 9606. ENSI9606. ENSI | 0 | 0 | 0 | 0      |
| F2R      | BDKRB2 | 1850333 | 1848988 | 9606. ENSI9606. ENSI | 0 | 0 | 0 | 0. 657 |
| F2R      | PTGER1 | 1850333 | 1847360 | 9606. ENSI9606. ENSI | 0 | 0 | 0 | 0      |
| F2R      | CHRM1  | 1850333 | 1848849 | 9606. ENSI9606. ENSI | 0 | 0 | 0 | 0      |
| F2R      | MAPK1  | 1850333 | 1842512 | 9606. ENSI9606. ENSI | 0 | 0 | 0 | 0      |
| F2R      | AGTR1  | 1850333 | 1846323 | 9606. ENSI9606. ENSI | 0 | 0 | 0 | 0. 731 |
| F2R      | ADRA1B | 1850333 | 1848870 | 9606. ENSI9606. ENSI | 0 | 0 | 0 | 0      |
| F2R      | HTR2B  | 1850333 | 1844597 | 9606. ENSI9606. ENSI | 0 | 0 | 0 | 0. 622 |
| F2R      | APP    | 1850333 | 1846936 | 9606. ENSI9606. ENSI | 0 | 0 | 0 | 0      |
| F2R      | FFAR1  | 1850333 | 1843825 | 9606. ENSI9606. ENSI | 0 | 0 | 0 | 0. 684 |
| F2R      | PIK3CA | 1850333 | 1845446 | 9606. ENSI9606. ENSI | 0 | 0 | 0 | 0      |
| FGFR1    | HRAS   | 1859710 | 1849235 | 9606. ENSI9606. ENSI | 0 | 0 | 0 | 0      |
| FGFR1    | CCND1  | 1859710 | 1843117 | 9606. ENSI9606. ENSI | 0 | 0 | 0 | 0      |
| FGFR1    | PIK3CA | 1859710 | 1845446 | 9606. ENSI9606. ENSI | 0 | 0 | 0 | 0      |
| FLT1     | NRP1   | 1846791 | 1845737 | 9606. ENSI9606. ENSI | 0 | 0 | 0 | 0      |
| FLT1     | KDR    | 1846791 | 1845437 | 9606. ENSI9606. ENSI | 0 | 0 | 0 | 0. 918 |
| FLT1     | PIK3CA | 1846791 | 1845446 | 9606. ENSI9606. ENSI | 0 | 0 | 0 | 0      |
| FLT1     | FLT4   | 1846791 | 1845029 | 9606. ENSI9606. ENSI | 0 | 0 | 0 | 0. 898 |
| GABRA2   | GABRB2 | 1853367 | 1846395 | 9606. ENSI9606. ENSI | 0 | 0 | 0 | 0. 84  |
| GABRA2   | GABRB3 | 1853367 | 1848038 | 9606. ENSI9606. ENSI | 0 | 0 | 0 | 0. 853 |
| GABRA2   | GABRA1 | 1853367 | 1842192 | 9606. ENSI9606. ENSI | 0 | 0 | 0 | 0. 979 |
| GABRA2   | GABRA5 | 1853367 | 1851869 | 9606. ENSI9606. ENSI | 0 | 0 | 0 | 0. 978 |
| GABRA3   | GABRB2 | 1855218 | 1846395 | 9606. ENSI9606. ENSI | 0 | 0 | 0 | 0. 828 |
| GABRA3   | GABRB3 | 1855218 | 1848038 | 9606. ENSI9606. ENSI | 0 | 0 | 0 | 0. 846 |
| GABRA3   | GABRA2 | 1855218 | 1853367 | 9606. ENSI9606. ENSI | 0 | 0 | 0 | 0. 977 |
| GABRA3   | GABRA1 | 1855218 | 1842192 | 9606. ENSI9606. ENSI | 0 | 0 | 0 | 0. 976 |
| GABRA3   | GABRA5 | 1855218 | 1851869 | 9606. ENSI9606. ENSI | 0 | 0 | 0 | 0. 976 |
| GABRA5   | GABRB2 | 1851869 | 1846395 | 9606. ENSI9606. ENSI | 0 | 0 | 0 | 0. 844 |
| GABRA5   | GABRB3 | 1851869 | 1848038 | 9606. ENSI9606. ENSI | 0 | 0 | 0 | 0. 852 |
| GABRA5   | GABRA1 | 1851869 | 1842192 | 9606. ENSI9606. ENSI | 0 | 0 | 0 | 0. 976 |
| GABRB2   | GABRA1 | 1846395 | 1842192 | 9606. ENSI9606. ENSI | 0 | 0 | 0 | 0. 848 |
| GABRB3   | GABRA1 | 1848038 | 1842192 | 9606. ENSI9606. ENSI | 0 | 0 | 0 | 0. 859 |
| GABRB3   | GABRB2 | 1848038 | 1846395 | 9606. ENSI9606. ENSI | 0 | 0 | 0 | 0. 982 |
| GABRG2   | GABRA1 | 1860865 | 1842192 | 9606. ENSI9606. ENSI | 0 | 0 | 0 | 0. 909 |
| GABRG2   | GABRB2 | 1860865 | 1846395 | 9606. ENSI9606. ENSI | 0 | 0 | 0 | 0. 82  |
| GABRG2   | GABRA2 | 1860865 | 1853367 | 9606. ENSI9606. ENSI | 0 | 0 | 0 | 0. 901 |
| GABRG2   | GABRA3 | 1860865 | 1855218 | 9606. ENSI9606. ENSI | 0 | 0 | 0 | 0. 899 |
| GABRG2   | GABRA5 | 1860865 | 1851869 | 9606. ENSI9606. ENSI | 0 | 0 | 0 | 0. 9   |
| GABRG2   | GABRB3 | 1860865 | 1848038 | 9606. ENSI9606. ENSI | 0 | 0 | 0 | 0. 851 |
| HLA-DRB1 | CTSD   | 1853944 | 1843439 | 9606. ENSI9606. ENSI | 0 | 0 | 0 | 0      |
| HLA-DRB1 | PTPN11 | 1853944 | 1852389 | 9606. ENSI9606. ENSI | 0 | 0 | 0 | 0      |
| HMGCR    | PPARA  | 1847097 | 1845205 | 9606. ENSI9606. ENSI | 0 | 0 | 0 | 0      |
| HRAS     | RAF1   | 1849235 | 1844086 | 9606. ENSI9606. ENSI | 0 | 0 | 0 | 0      |
| HRAS     | PIK3CA | 1849235 | 1845446 | 9606. ENSI9606. ENSI | 0 | 0 | 0 | 0      |
| HRAS     | BRAF   | 1849235 | 1847131 | 9606. ENSI9606. ENSI | 0 | 0 | 0 | 0      |
| HRAS     | EGFR   | 1849235 | 1846445 | 9606. ENSI9606. ENSI | 0 | 0 | 0 | 0      |
| HRAS     | TP53   | 1849235 | 1846083 | 9606. ENSI9606. ENSI | 0 | 0 | 0 | 0      |
| HRAS     | INSR   | 1849235 | 1848574 | 9606. ENSI9606. ENSI | 0 | 0 | 0 | 0      |
| HRAS     | KIT    | 1849235 | 1847112 | 9606. ENSI9606. ENSI | 0 | 0 | 0 | 0      |

|       |          |         |         |            |            |   |   |   |        |
|-------|----------|---------|---------|------------|------------|---|---|---|--------|
| HRAS  | PDGFRB   | 1849235 | 1844996 | 9606. ENSI | 9606. ENSI | 0 | 0 | 0 | 0      |
| HRAS  | MAPK1    | 1849235 | 1842512 | 9606. ENSI | 9606. ENSI | 0 | 0 | 0 | 0      |
| HRAS  | CCND1    | 1849235 | 1843117 | 9606. ENSI | 9606. ENSI | 0 | 0 | 0 | 0      |
| HRAS  | IRS1     | 1849235 | 1848682 | 9606. ENSI | 9606. ENSI | 0 | 0 | 0 | 0      |
| HRAS  | F2       | 1849235 | 1849080 | 9606. ENSI | 9606. ENSI | 0 | 0 | 0 | 0      |
| HRAS  | PRKCB    | 1849235 | 1848723 | 9606. ENSI | 9606. ENSI | 0 | 0 | 0 | 0      |
| HTR2A | APP      | 1856916 | 1846936 | 9606. ENSI | 9606. ENSI | 0 | 0 | 0 | 0      |
| HTR2A | F2R      | 1856916 | 1850333 | 9606. ENSI | 9606. ENSI | 0 | 0 | 0 | 0. 62  |
| HTR2A | EDNRB    | 1856916 | 1856642 | 9606. ENSI | 9606. ENSI | 0 | 0 | 0 | 0. 623 |
| HTR2A | HTR2B    | 1856916 | 1844597 | 9606. ENSI | 9606. ENSI | 0 | 0 | 0 | 0. 918 |
| HTR2A | EDNRA    | 1856916 | 1849748 | 9606. ENSI | 9606. ENSI | 0 | 0 | 0 | 0. 624 |
| HTR2A | AGTR1    | 1856916 | 1846323 | 9606. ENSI | 9606. ENSI | 0 | 0 | 0 | 0. 639 |
| HTR2A | CHRM1    | 1856916 | 1848849 | 9606. ENSI | 9606. ENSI | 0 | 0 | 0 | 0. 651 |
| HTR2A | PTGER1   | 1856916 | 1847360 | 9606. ENSI | 9606. ENSI | 0 | 0 | 0 | 0      |
| HTR2A | ADRA1B   | 1856916 | 1848870 | 9606. ENSI | 9606. ENSI | 0 | 0 | 0 | 0. 747 |
| HTR2A | FFAR1    | 1856916 | 1843825 | 9606. ENSI | 9606. ENSI | 0 | 0 | 0 | 0      |
| HTR2A | BDKRB2   | 1856916 | 1848988 | 9606. ENSI | 9606. ENSI | 0 | 0 | 0 | 0. 634 |
| HTR2A | PIK3CA   | 1856916 | 1845446 | 9606. ENSI | 9606. ENSI | 0 | 0 | 0 | 0      |
| HTR2B | FFAR1    | 1844597 | 1843825 | 9606. ENSI | 9606. ENSI | 0 | 0 | 0 | 0      |
| IL1B  | MAPK14   | 1845335 | 1843222 | 9606. ENSI | 9606. ENSI | 0 | 0 | 0 | 0      |
| IL1B  | IL6      | 1845335 | 1844631 | 9606. ENSI | 9606. ENSI | 0 | 0 | 0 | 0      |
| IL1B  | MMP2     | 1845335 | 1842719 | 9606. ENSI | 9606. ENSI | 0 | 0 | 0 | 0      |
| IL6   | SERPINE1 | 1844631 | 1842959 | 9606. ENSI | 9606. ENSI | 0 | 0 | 0 | 0      |
| IL6   | MMP2     | 1844631 | 1842719 | 9606. ENSI | 9606. ENSI | 0 | 0 | 0 | 0      |
| IL6   | ESR1     | 1844631 | 1842435 | 9606. ENSI | 9606. ENSI | 0 | 0 | 0 | 0      |
| IL6   | CCND1    | 1844631 | 1843117 | 9606. ENSI | 9606. ENSI | 0 | 0 | 0 | 0      |
| IL6   | MAPK14   | 1844631 | 1843222 | 9606. ENSI | 9606. ENSI | 0 | 0 | 0 | 0      |
| INSR  | PIK3CA   | 1848574 | 1845446 | 9606. ENSI | 9606. ENSI | 0 | 0 | 0 | 0      |
| INSR  | AKT1     | 1848574 | 1846136 | 9606. ENSI | 9606. ENSI | 0 | 0 | 0 | 0. 62  |
| INSR  | RPS6KB1  | 1848574 | 1843035 | 9606. ENSI | 9606. ENSI | 0 | 0 | 0 | 0. 62  |
| IRS1  | INSR     | 1848682 | 1848574 | 9606. ENSI | 9606. ENSI | 0 | 0 | 0 | 0      |
| IRS1  | RPS6KB1  | 1848682 | 1843035 | 9606. ENSI | 9606. ENSI | 0 | 0 | 0 | 0      |
| IRS1  | PIK3CA   | 1848682 | 1845446 | 9606. ENSI | 9606. ENSI | 0 | 0 | 0 | 0      |
| IRS1  | AKT1     | 1848682 | 1846136 | 9606. ENSI | 9606. ENSI | 0 | 0 | 0 | 0      |
| IRS1  | MAPK1    | 1848682 | 1842512 | 9606. ENSI | 9606. ENSI | 0 | 0 | 0 | 0      |
| IRS1  | ESR1     | 1848682 | 1842435 | 9606. ENSI | 9606. ENSI | 0 | 0 | 0 | 0      |
| IRS1  | EGFR     | 1848682 | 1846445 | 9606. ENSI | 9606. ENSI | 0 | 0 | 0 | 0      |
| IRS1  | IL6      | 1848682 | 1844631 | 9606. ENSI | 9606. ENSI | 0 | 0 | 0 | 0      |
| IRS1  | STAT3    | 1848682 | 1845584 | 9606. ENSI | 9606. ENSI | 0 | 0 | 0 | 0      |
| IRS1  | ITGB3    | 1848682 | 1845040 | 9606. ENSI | 9606. ENSI | 0 | 0 | 0 | 0      |
| IRS1  | PDGFRB   | 1848682 | 1844996 | 9606. ENSI | 9606. ENSI | 0 | 0 | 0 | 0      |
| ITGB1 | FLT4     | 1848520 | 1845029 | 9606. ENSI | 9606. ENSI | 0 | 0 | 0 | 0      |
| ITGB1 | KDR      | 1848520 | 1845437 | 9606. ENSI | 9606. ENSI | 0 | 0 | 0 | 0      |
| ITGB1 | EGFR     | 1848520 | 1846445 | 9606. ENSI | 9606. ENSI | 0 | 0 | 0 | 0      |
| ITGB1 | PIK3CA   | 1848520 | 1845446 | 9606. ENSI | 9606. ENSI | 0 | 0 | 0 | 0      |
| ITGB1 | RPS6KB1  | 1848520 | 1843035 | 9606. ENSI | 9606. ENSI | 0 | 0 | 0 | 0      |
| ITGB1 | CAPNS1   | 1848520 | 1843820 | 9606. ENSI | 9606. ENSI | 0 | 0 | 0 | 0      |
| ITGB3 | PDGFRB   | 1845040 | 1844996 | 9606. ENSI | 9606. ENSI | 0 | 0 | 0 | 0      |
| ITGB3 | SERPINE1 | 1845040 | 1842959 | 9606. ENSI | 9606. ENSI | 0 | 0 | 0 | 0      |
| ITGB3 | MAPK1    | 1845040 | 1842512 | 9606. ENSI | 9606. ENSI | 0 | 0 | 0 | 0      |
| JAK2  | PTPN11   | 1857411 | 1852389 | 9606. ENSI | 9606. ENSI | 0 | 0 | 0 | 0      |
| JAK2  | STAT3    | 1857411 | 1845584 | 9606. ENSI | 9606. ENSI | 0 | 0 | 0 | 0      |
| JAK2  | IRS1     | 1857411 | 1848682 | 9606. ENSI | 9606. ENSI | 0 | 0 | 0 | 0      |
| JAK2  | IL6      | 1857411 | 1844631 | 9606. ENSI | 9606. ENSI | 0 | 0 | 0 | 0      |

|        |          |         |         |            |            |   |   |        |        |
|--------|----------|---------|---------|------------|------------|---|---|--------|--------|
| JAK2   | KIT      | 1857411 | 1847112 | 9606. ENSI | 9606. ENSI | 0 | 0 | 0      | 0. 619 |
| JAK2   | CCR5     | 1857411 | 1847342 | 9606. ENSI | 9606. ENSI | 0 | 0 | 0      | 0      |
| JAK2   | PDGFRB   | 1857411 | 1844996 | 9606. ENSI | 9606. ENSI | 0 | 0 | 0      | 0. 616 |
| JAK2   | PIK3CA   | 1857411 | 1845446 | 9606. ENSI | 9606. ENSI | 0 | 0 | 0      | 0      |
| JAK2   | AGTR1    | 1857411 | 1846323 | 9606. ENSI | 9606. ENSI | 0 | 0 | 0      | 0      |
| JAK2   | HRAS     | 1857411 | 1849235 | 9606. ENSI | 9606. ENSI | 0 | 0 | 0      | 0      |
| JAK2   | IL1B     | 1857411 | 1845335 | 9606. ENSI | 9606. ENSI | 0 | 0 | 0      | 0      |
| JAK2   | BCL2     | 1857411 | 1851168 | 9606. ENSI | 9606. ENSI | 0 | 0 | 0      | 0      |
| JAK2   | MAPK1    | 1857411 | 1842512 | 9606. ENSI | 9606. ENSI | 0 | 0 | 0      | 0. 653 |
| JAK2   | NOS2     | 1857411 | 1850906 | 9606. ENSI | 9606. ENSI | 0 | 0 | 0      | 0      |
| JAK2   | HTR2A    | 1857411 | 1856916 | 9606. ENSI | 9606. ENSI | 0 | 0 | 0      | 0      |
| JAK2   | PIK3CG   | 1857411 | 1853801 | 9606. ENSI | 9606. ENSI | 0 | 0 | 0      | 0      |
| JAK2   | EDNRA    | 1857411 | 1849748 | 9606. ENSI | 9606. ENSI | 0 | 0 | 0      | 0      |
| JAK2   | EGFR     | 1857411 | 1846445 | 9606. ENSI | 9606. ENSI | 0 | 0 | 0      | 0. 63  |
| JAK2   | MPO      | 1857411 | 1843011 | 9606. ENSI | 9606. ENSI | 0 | 0 | 0      | 0      |
| KCNH2  | KCNQ1    | 1845083 | 1842257 | 9606. ENSI | 9606. ENSI | 0 | 0 | 0      | 0      |
| KDR    | FLT4     | 1845437 | 1845029 | 9606. ENSI | 9606. ENSI | 0 | 0 | 0      | 0. 92  |
| KDR    | ITGB3    | 1845437 | 1845040 | 9606. ENSI | 9606. ENSI | 0 | 0 | 0      | 0      |
| KDR    | IL6      | 1845437 | 1844631 | 9606. ENSI | 9606. ENSI | 0 | 0 | 0      | 0      |
| KIT    | STAT3    | 1847112 | 1845584 | 9606. ENSI | 9606. ENSI | 0 | 0 | 0      | 0      |
| KIT    | PIK3CA   | 1847112 | 1845446 | 9606. ENSI | 9606. ENSI | 0 | 0 | 0      | 0      |
| KIT    | RPS6KB1  | 1847112 | 1843035 | 9606. ENSI | 9606. ENSI | 0 | 0 | 0      | 0. 617 |
| LDLR   | LPL      | 1862854 | 1849220 | 9606. ENSI | 9606. ENSI | 0 | 0 | 0      | 0      |
| LDLR   | LIPC     | 1862854 | 1848014 | 9606. ENSI | 9606. ENSI | 0 | 0 | 0      | 0      |
| LIPC   | LIPG     | 1848014 | 1844879 | 9606. ENSI | 9606. ENSI | 0 | 0 | 0      | 0. 923 |
| LPL    | PPARA    | 1849220 | 1845205 | 9606. ENSI | 9606. ENSI | 0 | 0 | 0      | 0      |
| LPL    | PPARG    | 1849220 | 1847090 | 9606. ENSI | 9606. ENSI | 0 | 0 | 0      | 0      |
| LPL    | FABP4    | 1849220 | 1844407 | 9606. ENSI | 9606. ENSI | 0 | 0 | 0      | 0      |
| LPL    | NR3C1    | 1849220 | 1843294 | 9606. ENSI | 9606. ENSI | 0 | 0 | 0      | 0      |
| LPL    | LIPC     | 1849220 | 1848014 | 9606. ENSI | 9606. ENSI | 0 | 0 | 0      | 0. 928 |
| LPL    | LIPG     | 1849220 | 1844879 | 9606. ENSI | 9606. ENSI | 0 | 0 | 0      | 0. 943 |
| MAPK1  | ESR1     | 1842512 | 1842435 | 9606. ENSI | 9606. ENSI | 0 | 0 | 0      | 0      |
| MAPK14 | MAPK1    | 1843222 | 1842512 | 9606. ENSI | 9606. ENSI | 0 | 0 | 0. 342 | 0. 939 |
| MAPK14 | ESR1     | 1843222 | 1842435 | 9606. ENSI | 9606. ENSI | 0 | 0 | 0      | 0      |
| MAPK14 | MAPK13   | 1843222 | 1842465 | 9606. ENSI | 9606. ENSI | 0 | 0 | 0. 525 | 0. 971 |
| MAPK14 | CCND1    | 1843222 | 1843117 | 9606. ENSI | 9606. ENSI | 0 | 0 | 0      | 0      |
| MAPT   | AKT1     | 1852372 | 1846136 | 9606. ENSI | 9606. ENSI | 0 | 0 | 0      | 0      |
| MAPT   | APP      | 1852372 | 1846936 | 9606. ENSI | 9606. ENSI | 0 | 0 | 0      | 0      |
| MAPT   | LRRK2    | 1852372 | 1848005 | 9606. ENSI | 9606. ENSI | 0 | 0 | 0      | 0      |
| MAPT   | PSEN1    | 1852372 | 1850825 | 9606. ENSI | 9606. ENSI | 0 | 0 | 0      | 0      |
| MLST8  | RICTOR   | 1858459 | 1853522 | 9606. ENSI | 9606. ENSI | 0 | 0 | 0      | 0      |
| MLST8  | EIF4EBP1 | 1858459 | 1852358 | 9606. ENSI | 9606. ENSI | 0 | 0 | 0      | 0      |
| MLST8  | RPTOR    | 1858459 | 1848942 | 9606. ENSI | 9606. ENSI | 0 | 0 | 0      | 0      |
| MLST8  | MTOR     | 1858459 | 1854147 | 9606. ENSI | 9606. ENSI | 0 | 0 | 0      | 0      |
| MLST8  | RPS6KB1  | 1858459 | 1843035 | 9606. ENSI | 9606. ENSI | 0 | 0 | 0      | 0      |
| MLST8  | AKT1     | 1858459 | 1846136 | 9606. ENSI | 9606. ENSI | 0 | 0 | 0      | 0      |
| MLST8  | IRS1     | 1858459 | 1848682 | 9606. ENSI | 9606. ENSI | 0 | 0 | 0      | 0      |
| MME    | REN      | 1854017 | 1846232 | 9606. ENSI | 9606. ENSI | 0 | 0 | 0      | 0      |
| MMP1   | EDNRA    | 1850481 | 1849748 | 9606. ENSI | 9606. ENSI | 0 | 0 | 0      | 0      |
| MMP1   | IL6      | 1850481 | 1844631 | 9606. ENSI | 9606. ENSI | 0 | 0 | 0      | 0      |
| MMP1   | IL1B     | 1850481 | 1845335 | 9606. ENSI | 9606. ENSI | 0 | 0 | 0      | 0      |
| MMP1   | MMP2     | 1850481 | 1842719 | 9606. ENSI | 9606. ENSI | 0 | 0 | 0      | 0. 798 |
| MMP1   | ELANE    | 1850481 | 1845377 | 9606. ENSI | 9606. ENSI | 0 | 0 | 0      | 0      |
| MMP1   | AKT1     | 1850481 | 1846136 | 9606. ENSI | 9606. ENSI | 0 | 0 | 0      | 0      |



|       |          |         |         |                      |   |   |   |        |
|-------|----------|---------|---------|----------------------|---|---|---|--------|
| MMP1  | TP53     | 1850481 | 1846083 | 9606. ENSI9606. ENSI | 0 | 0 | 0 | 0      |
| MMP3  | IL1B     | 1848108 | 1845335 | 9606. ENSI9606. ENSI | 0 | 0 | 0 | 0      |
| MMP9  | PLG      | 1855661 | 1849130 | 9606. ENSI9606. ENSI | 0 | 0 | 0 | 0      |
| MMP9  | AKT1     | 1855661 | 1846136 | 9606. ENSI9606. ENSI | 0 | 0 | 0 | 0      |
| MMP9  | IL6      | 1855661 | 1844631 | 9606. ENSI9606. ENSI | 0 | 0 | 0 | 0      |
| MMP9  | EGFR     | 1855661 | 1846445 | 9606. ENSI9606. ENSI | 0 | 0 | 0 | 0      |
| MMP9  | TP53     | 1855661 | 1846083 | 9606. ENSI9606. ENSI | 0 | 0 | 0 | 0      |
| MMP9  | BCL2     | 1855661 | 1851168 | 9606. ENSI9606. ENSI | 0 | 0 | 0 | 0      |
| MMP9  | IL1B     | 1855661 | 1845335 | 9606. ENSI9606. ENSI | 0 | 0 | 0 | 0      |
| MMP9  | ELANE    | 1855661 | 1845377 | 9606. ENSI9606. ENSI | 0 | 0 | 0 | 0      |
| MMP9  | MMP1     | 1855661 | 1850481 | 9606. ENSI9606. ENSI | 0 | 0 | 0 | 0. 745 |
| MMP9  | STAT3    | 1855661 | 1845584 | 9606. ENSI9606. ENSI | 0 | 0 | 0 | 0      |
| MMP9  | FLT1     | 1855661 | 1846791 | 9606. ENSI9606. ENSI | 0 | 0 | 0 | 0      |
| MMP9  | MMP2     | 1855661 | 1842719 | 9606. ENSI9606. ENSI | 0 | 0 | 0 | 0. 94  |
| MMP9  | HRAS     | 1855661 | 1849235 | 9606. ENSI9606. ENSI | 0 | 0 | 0 | 0      |
| MTOR  | IRS1     | 1854147 | 1848682 | 9606. ENSI9606. ENSI | 0 | 0 | 0 | 0      |
| MTOR  | EIF4EBP1 | 1854147 | 1852358 | 9606. ENSI9606. ENSI | 0 | 0 | 0 | 0      |
| MTOR  | RPS6KB1  | 1854147 | 1843035 | 9606. ENSI9606. ENSI | 0 | 0 | 0 | 0      |
| MTOR  | STAT3    | 1854147 | 1845584 | 9606. ENSI9606. ENSI | 0 | 0 | 0 | 0      |
| MTOR  | RICTOR   | 1854147 | 1853522 | 9606. ENSI9606. ENSI | 0 | 0 | 0 | 0      |
| MTOR  | AKT1     | 1854147 | 1846136 | 9606. ENSI9606. ENSI | 0 | 0 | 0 | 0      |
| MTOR  | RPTOR    | 1854147 | 1848942 | 9606. ENSI9606. ENSI | 0 | 0 | 0 | 0      |
| MTOR  | TERT     | 1854147 | 1849199 | 9606. ENSI9606. ENSI | 0 | 0 | 0 | 0      |
| MTOR  | TP53     | 1854147 | 1846083 | 9606. ENSI9606. ENSI | 0 | 0 | 0 | 0      |
| MTOR  | EGFR     | 1854147 | 1846445 | 9606. ENSI9606. ENSI | 0 | 0 | 0 | 0      |
| MTOR  | PIK3CG   | 1854147 | 1853801 | 9606. ENSI9606. ENSI | 0 | 0 | 0 | 0      |
| MTOR  | BCL2     | 1854147 | 1851168 | 9606. ENSI9606. ENSI | 0 | 0 | 0 | 0      |
| MTOR  | PIK3CA   | 1854147 | 1845446 | 9606. ENSI9606. ENSI | 0 | 0 | 0 | 0. 61  |
| MTOR  | CCND1    | 1854147 | 1843117 | 9606. ENSI9606. ENSI | 0 | 0 | 0 | 0      |
| MTOR  | PDGFRB   | 1854147 | 1844996 | 9606. ENSI9606. ENSI | 0 | 0 | 0 | 0      |
| MTOR  | PTPN11   | 1854147 | 1852389 | 9606. ENSI9606. ENSI | 0 | 0 | 0 | 0      |
| MTOR  | IL6      | 1854147 | 1844631 | 9606. ENSI9606. ENSI | 0 | 0 | 0 | 0      |
| MTOR  | PPARG    | 1854147 | 1847090 | 9606. ENSI9606. ENSI | 0 | 0 | 0 | 0      |
| MTOR  | FLT4     | 1854147 | 1845029 | 9606. ENSI9606. ENSI | 0 | 0 | 0 | 0      |
| MTOR  | PRKCB    | 1854147 | 1848723 | 9606. ENSI9606. ENSI | 0 | 0 | 0 | 0      |
| MYLK  | ITGB1    | 1853981 | 1848520 | 9606. ENSI9606. ENSI | 0 | 0 | 0 | 0      |
| MYLK  | MAPK1    | 1853981 | 1842512 | 9606. ENSI9606. ENSI | 0 | 0 | 0 | 0. 636 |
| NLRP3 | IL1B     | 1851990 | 1845335 | 9606. ENSI9606. ENSI | 0 | 0 | 0 | 0      |
| NLRP3 | APP      | 1851990 | 1846936 | 9606. ENSI9606. ENSI | 0 | 0 | 0 | 0      |
| NOS2  | MAPK14   | 1850906 | 1843222 | 9606. ENSI9606. ENSI | 0 | 0 | 0 | 0      |
| NOS2  | PPARA    | 1850906 | 1845205 | 9606. ENSI9606. ENSI | 0 | 0 | 0 | 0      |
| NR1H2 | ESR1     | 1844246 | 1842435 | 9606. ENSI9606. ENSI | 0 | 0 | 0 | 0. 689 |
| NR1H3 | PPARA    | 1859317 | 1845205 | 9606. ENSI9606. ENSI | 0 | 0 | 0 | 0. 744 |
| NR1H3 | LPL      | 1859317 | 1849220 | 9606. ENSI9606. ENSI | 0 | 0 | 0 | 0      |
| NR1H3 | NR1H2    | 1859317 | 1844246 | 9606. ENSI9606. ENSI | 0 | 0 | 0 | 0. 969 |
| NR1I2 | ABCB1    | 1851892 | 1845794 | 9606. ENSI9606. ENSI | 0 | 0 | 0 | 0      |
| NR3C1 | SERPINE1 | 1843294 | 1842959 | 9606. ENSI9606. ENSI | 0 | 0 | 0 | 0      |
| NR3C1 | ESR1     | 1843294 | 1842435 | 9606. ENSI9606. ENSI | 0 | 0 | 0 | 0. 695 |
| NRP1  | KDR      | 1845737 | 1845437 | 9606. ENSI9606. ENSI | 0 | 0 | 0 | 0      |
| NTRK1 | SHC1     | 1861874 | 1860266 | 9606. ENSI9606. ENSI | 0 | 0 | 0 | 0      |
| NTRK1 | STAT3    | 1861874 | 1845584 | 9606. ENSI9606. ENSI | 0 | 0 | 0 | 0      |
| NTRK1 | IRS1     | 1861874 | 1848682 | 9606. ENSI9606. ENSI | 0 | 0 | 0 | 0      |
| NTRK1 | PIK3CA   | 1861874 | 1845446 | 9606. ENSI9606. ENSI | 0 | 0 | 0 | 0      |
| NTRK1 | BRAF     | 1861874 | 1847131 | 9606. ENSI9606. ENSI | 0 | 0 | 0 | 0. 624 |

|         |          |         |         |                      |        |   |   |        |
|---------|----------|---------|---------|----------------------|--------|---|---|--------|
| PDGFRB  | RAF1     | 1844996 | 1844086 | 9606. ENSI9606. ENSI | 0      | 0 | 0 | 0. 624 |
| PIK3CA  | RPS6KB1  | 1845446 | 1843035 | 9606. ENSI9606. ENSI | 0      | 0 | 0 | 0      |
| PIK3CA  | ESR1     | 1845446 | 1842435 | 9606. ENSI9606. ENSI | 0      | 0 | 0 | 0      |
| PIK3CA  | PDGFRB   | 1845446 | 1844996 | 9606. ENSI9606. ENSI | 0      | 0 | 0 | 0      |
| PIK3CA  | CCND1    | 1845446 | 1843117 | 9606. ENSI9606. ENSI | 0      | 0 | 0 | 0      |
| PIK3CA  | KDR      | 1845446 | 1845437 | 9606. ENSI9606. ENSI | 0      | 0 | 0 | 0      |
| PIK3CA  | FLT4     | 1845446 | 1845029 | 9606. ENSI9606. ENSI | 0      | 0 | 0 | 0      |
| PIK3CA  | RAF1     | 1845446 | 1844086 | 9606. ENSI9606. ENSI | 0      | 0 | 0 | 0      |
| PIK3CA  | ITGB3    | 1845446 | 1845040 | 9606. ENSI9606. ENSI | 0      | 0 | 0 | 0      |
| PIK3CA  | IL1B     | 1845446 | 1845335 | 9606. ENSI9606. ENSI | 0      | 0 | 0 | 0      |
| PIK3CA  | NR3C1    | 1845446 | 1843294 | 9606. ENSI9606. ENSI | 0      | 0 | 0 | 0      |
| PIK3CA  | HTR2B    | 1845446 | 1844597 | 9606. ENSI9606. ENSI | 0      | 0 | 0 | 0      |
| PIK3CA  | FFAR1    | 1845446 | 1843825 | 9606. ENSI9606. ENSI | 0      | 0 | 0 | 0      |
| PIK3CG  | HRAS     | 1853801 | 1849235 | 9606. ENSI9606. ENSI | 0      | 0 | 0 | 0      |
| PIK3CG  | AKT1     | 1853801 | 1846136 | 9606. ENSI9606. ENSI | 0      | 0 | 0 | 0      |
| PIK3CG  | KIT      | 1853801 | 1847112 | 9606. ENSI9606. ENSI | 0      | 0 | 0 | 0      |
| PIK3CG  | PTPN11   | 1853801 | 1852389 | 9606. ENSI9606. ENSI | 0      | 0 | 0 | 0      |
| PIK3CG  | IRS1     | 1853801 | 1848682 | 9606. ENSI9606. ENSI | 0      | 0 | 0 | 0      |
| PIK3CG  | EGFR     | 1853801 | 1846445 | 9606. ENSI9606. ENSI | 0      | 0 | 0 | 0      |
| PIK3CG  | PIK3CA   | 1853801 | 1845446 | 9606. ENSI9606. ENSI | 0      | 0 | 0 | 0. 83  |
| PLA2G2A | PTGS2    | 1856239 | 1854602 | 9606. ENSI9606. ENSI | 0      | 0 | 0 | 0      |
| PLA2G2A | PLA2G7   | 1856239 | 1846414 | 9606. ENSI9606. ENSI | 0      | 0 | 0 | 0      |
| PLA2G2A | PTGS1    | 1856239 | 1854170 | 9606. ENSI9606. ENSI | 0      | 0 | 0 | 0      |
| PLA2G2A | CYP2C19  | 1856239 | 1855462 | 9606. ENSI9606. ENSI | 0      | 0 | 0 | 0      |
| PLG     | SERPINE1 | 1849130 | 1842959 | 9606. ENSI9606. ENSI | 0. 083 | 0 | 0 | 0      |
| PLG     | ALB      | 1849130 | 1847637 | 9606. ENSI9606. ENSI | 0      | 0 | 0 | 0      |
| PLG     | APP      | 1849130 | 1846936 | 9606. ENSI9606. ENSI | 0      | 0 | 0 | 0      |
| PPARA   | MAPK1    | 1845205 | 1842512 | 9606. ENSI9606. ENSI | 0      | 0 | 0 | 0      |
| PPARA   | FABP4    | 1845205 | 1844407 | 9606. ENSI9606. ENSI | 0      | 0 | 0 | 0      |
| PPARA   | SCARB1   | 1845205 | 1844967 | 9606. ENSI9606. ENSI | 0      | 0 | 0 | 0      |
| PPARA   | IL6      | 1845205 | 1844631 | 9606. ENSI9606. ENSI | 0      | 0 | 0 | 0      |
| PPARA   | NR1H2    | 1845205 | 1844246 | 9606. ENSI9606. ENSI | 0      | 0 | 0 | 0. 652 |
| PPARA   | ESR1     | 1845205 | 1842435 | 9606. ENSI9606. ENSI | 0      | 0 | 0 | 0. 65  |
| PPARD   | NR1H2    | 1849364 | 1844246 | 9606. ENSI9606. ENSI | 0      | 0 | 0 | 0. 714 |
| PPARD   | ESR1     | 1849364 | 1842435 | 9606. ENSI9606. ENSI | 0      | 0 | 0 | 0. 65  |
| PPARD   | THRA     | 1849364 | 1845577 | 9606. ENSI9606. ENSI | 0      | 0 | 0 | 0. 71  |
| PPARD   | PPARG    | 1849364 | 1847090 | 9606. ENSI9606. ENSI | 0      | 0 | 0 | 0. 967 |
| PPARD   | PPARA    | 1849364 | 1845205 | 9606. ENSI9606. ENSI | 0      | 0 | 0 | 0. 971 |
| PPARG   | ESR1     | 1847090 | 1842435 | 9606. ENSI9606. ENSI | 0      | 0 | 0 | 0. 651 |
| PPARG   | FABP4    | 1847090 | 1844407 | 9606. ENSI9606. ENSI | 0      | 0 | 0 | 0      |
| PPARG   | CDK4     | 1847090 | 1844551 | 9606. ENSI9606. ENSI | 0      | 0 | 0 | 0      |
| PPARG   | HSD11B1  | 1847090 | 1844918 | 9606. ENSI9606. ENSI | 0      | 0 | 0 | 0      |
| PPARG   | NR1H2    | 1847090 | 1844246 | 9606. ENSI9606. ENSI | 0      | 0 | 0 | 0. 726 |
| PPARG   | TP53     | 1847090 | 1846083 | 9606. ENSI9606. ENSI | 0      | 0 | 0 | 0      |
| PPARG   | SERPINE1 | 1847090 | 1842959 | 9606. ENSI9606. ENSI | 0      | 0 | 0 | 0      |
| PPARG   | THRA     | 1847090 | 1845577 | 9606. ENSI9606. ENSI | 0      | 0 | 0 | 0. 687 |
| PPARG   | IL1B     | 1847090 | 1845335 | 9606. ENSI9606. ENSI | 0      | 0 | 0 | 0      |
| PPARG   | PPARA    | 1847090 | 1845205 | 9606. ENSI9606. ENSI | 0      | 0 | 0 | 0. 962 |
| PRKCA   | BRAF     | 1860737 | 1847131 | 9606. ENSI9606. ENSI | 0      | 0 | 0 | 0. 62  |
| PRKCA   | EGFR     | 1860737 | 1846445 | 9606. ENSI9606. ENSI | 0      | 0 | 0 | 0. 619 |
| PRKCA   | TBXA2R   | 1860737 | 1859713 | 9606. ENSI9606. ENSI | 0      | 0 | 0 | 0      |
| PRKCA   | RICTOR   | 1860737 | 1853522 | 9606. ENSI9606. ENSI | 0      | 0 | 0 | 0      |
| PRKCA   | MTOR     | 1860737 | 1854147 | 9606. ENSI9606. ENSI | 0      | 0 | 0 | 0      |
| PRKCA   | RAF1     | 1860737 | 1844086 | 9606. ENSI9606. ENSI | 0      | 0 | 0 | 0. 624 |

|        |         |         |         |            |            |   |   |       |        |
|--------|---------|---------|---------|------------|------------|---|---|-------|--------|
| PRKCA  | ITGB1   | 1860737 | 1848520 | 9606. ENSI | 9606. ENSI | 0 | 0 | 0     | 0      |
| PRKCA  | KIT     | 1860737 | 1847112 | 9606. ENSI | 9606. ENSI | 0 | 0 | 0     | 0. 613 |
| PRKCA  | TERT    | 1860737 | 1849199 | 9606. ENSI | 9606. ENSI | 0 | 0 | 0     | 0      |
| PRKCA  | MLST8   | 1860737 | 1858459 | 9606. ENSI | 9606. ENSI | 0 | 0 | 0     | 0      |
| PRKCA  | MAPK1   | 1860737 | 1842512 | 9606. ENSI | 9606. ENSI | 0 | 0 | 0     | 0. 644 |
| PRKCA  | BCL2    | 1860737 | 1851168 | 9606. ENSI | 9606. ENSI | 0 | 0 | 0     | 0      |
| PRKCA  | PIK3CA  | 1860737 | 1845446 | 9606. ENSI | 9606. ENSI | 0 | 0 | 0     | 0      |
| PRKCA  | HRAS    | 1860737 | 1849235 | 9606. ENSI | 9606. ENSI | 0 | 0 | 0     | 0      |
| PRKCA  | RPS6KB1 | 1860737 | 1843035 | 9606. ENSI | 9606. ENSI | 0 | 0 | 0     | 0. 838 |
| PRKCA  | JAK2    | 1860737 | 1857411 | 9606. ENSI | 9606. ENSI | 0 | 0 | 0     | 0. 617 |
| PRKCA  | RET     | 1860737 | 1853238 | 9606. ENSI | 9606. ENSI | 0 | 0 | 0     | 0. 616 |
| PRKCA  | ADAM17  | 1860737 | 1849242 | 9606. ENSI | 9606. ENSI | 0 | 0 | 0     | 0      |
| PRKCA  | PRKCB   | 1860737 | 1848723 | 9606. ENSI | 9606. ENSI | 0 | 0 | 0     | 0. 985 |
| PRKCB  | EGFR    | 1848723 | 1846445 | 9606. ENSI | 9606. ENSI | 0 | 0 | 0     | 0. 616 |
| PRKCB  | RPS6KB1 | 1848723 | 1843035 | 9606. ENSI | 9606. ENSI | 0 | 0 | 0     | 0. 825 |
| PRKCB  | RAF1    | 1848723 | 1844086 | 9606. ENSI | 9606. ENSI | 0 | 0 | 0     | 0. 622 |
| PRKCB  | BRAF    | 1848723 | 1847131 | 9606. ENSI | 9606. ENSI | 0 | 0 | 0     | 0. 622 |
| PRKCH  | MAPK1   | 1851111 | 1842512 | 9606. ENSI | 9606. ENSI | 0 | 0 | 0     | 0. 632 |
| PRKCH  | HRAS    | 1851111 | 1849235 | 9606. ENSI | 9606. ENSI | 0 | 0 | 0     | 0      |
| PSEN1  | APP     | 1850825 | 1846936 | 9606. ENSI | 9606. ENSI | 0 | 0 | 0     | 0      |
| PSEN2  | APP     | 1854447 | 1846936 | 9606. ENSI | 9606. ENSI | 0 | 0 | 0     | 0      |
| PSEN2  | ADAM10  | 1854447 | 1844789 | 9606. ENSI | 9606. ENSI | 0 | 0 | 0     | 0      |
| PSEN2  | ADAM17  | 1854447 | 1849242 | 9606. ENSI | 9606. ENSI | 0 | 0 | 0     | 0      |
| PSEN2  | ESR1    | 1854447 | 1842435 | 9606. ENSI | 9606. ENSI | 0 | 0 | 0     | 0      |
| PTGER1 | APP     | 1847360 | 1846936 | 9606. ENSI | 9606. ENSI | 0 | 0 | 0     | 0      |
| PTGER1 | HTR2B   | 1847360 | 1844597 | 9606. ENSI | 9606. ENSI | 0 | 0 | 0     | 0      |
| PTGER1 | FFAR1   | 1847360 | 1843825 | 9606. ENSI | 9606. ENSI | 0 | 0 | 0     | 0      |
| PTGER1 | HTR2C   | 1847360 | 1846478 | 9606. ENSI | 9606. ENSI | 0 | 0 | 0     | 0      |
| PTGER1 | AGTR1   | 1847360 | 1846323 | 9606. ENSI | 9606. ENSI | 0 | 0 | 0     | 0      |
| PTGER1 | CCR5    | 1847360 | 1847342 | 9606. ENSI | 9606. ENSI | 0 | 0 | 0     | 0      |
| PTGER1 | PIK3CA  | 1847360 | 1845446 | 9606. ENSI | 9606. ENSI | 0 | 0 | 0     | 0      |
| PTGS1  | MPO     | 1854170 | 1843011 | 9606. ENSI | 9606. ENSI | 0 | 0 | 0. 33 | 0      |
| PTGS2  | TP53    | 1854602 | 1846083 | 9606. ENSI | 9606. ENSI | 0 | 0 | 0     | 0      |
| PTGS2  | MAPK14  | 1854602 | 1843222 | 9606. ENSI | 9606. ENSI | 0 | 0 | 0     | 0      |
| PTGS2  | MAPK1   | 1854602 | 1842512 | 9606. ENSI | 9606. ENSI | 0 | 0 | 0     | 0      |
| PTGS2  | BCL2    | 1854602 | 1851168 | 9606. ENSI | 9606. ENSI | 0 | 0 | 0     | 0      |
| PTGS2  | AKT1    | 1854602 | 1846136 | 9606. ENSI | 9606. ENSI | 0 | 0 | 0     | 0      |
| PTGS2  | PPARA   | 1854602 | 1845205 | 9606. ENSI | 9606. ENSI | 0 | 0 | 0     | 0      |
| PTGS2  | IL6     | 1854602 | 1844631 | 9606. ENSI | 9606. ENSI | 0 | 0 | 0     | 0      |
| PTGS2  | IL1B    | 1854602 | 1845335 | 9606. ENSI | 9606. ENSI | 0 | 0 | 0     | 0      |
| PTGS2  | NOS2    | 1854602 | 1850906 | 9606. ENSI | 9606. ENSI | 0 | 0 | 0     | 0      |
| PTPN11 | KIT     | 1852389 | 1847112 | 9606. ENSI | 9606. ENSI | 0 | 0 | 0     | 0      |
| PTPN11 | EGFR    | 1852389 | 1846445 | 9606. ENSI | 9606. ENSI | 0 | 0 | 0     | 0      |
| PTPN11 | INSR    | 1852389 | 1848574 | 9606. ENSI | 9606. ENSI | 0 | 0 | 0     | 0      |
| PTPN11 | IRS1    | 1852389 | 1848682 | 9606. ENSI | 9606. ENSI | 0 | 0 | 0     | 0      |
| PTPN11 | PDGFRB  | 1852389 | 1844996 | 9606. ENSI | 9606. ENSI | 0 | 0 | 0     | 0      |
| PTPN11 | KDR     | 1852389 | 1845437 | 9606. ENSI | 9606. ENSI | 0 | 0 | 0     | 0      |
| PTPN11 | FLT1    | 1852389 | 1846791 | 9606. ENSI | 9606. ENSI | 0 | 0 | 0     | 0      |
| PTPN11 | IL6     | 1852389 | 1844631 | 9606. ENSI | 9606. ENSI | 0 | 0 | 0     | 0      |
| PTPN11 | AKT1    | 1852389 | 1846136 | 9606. ENSI | 9606. ENSI | 0 | 0 | 0     | 0      |
| PTPN11 | STAT3   | 1852389 | 1845584 | 9606. ENSI | 9606. ENSI | 0 | 0 | 0     | 0      |
| PTPN11 | HRAS    | 1852389 | 1849235 | 9606. ENSI | 9606. ENSI | 0 | 0 | 0     | 0      |
| PTPN11 | MAPK1   | 1852389 | 1842512 | 9606. ENSI | 9606. ENSI | 0 | 0 | 0     | 0      |
| PTPN11 | PIK3CA  | 1852389 | 1845446 | 9606. ENSI | 9606. ENSI | 0 | 0 | 0     | 0      |

|         |          |         |         |            |            |   |   |   |        |
|---------|----------|---------|---------|------------|------------|---|---|---|--------|
| PTPN11  | TP53     | 1852389 | 1846083 | 9606. ENSI | 9606. ENSI | 0 | 0 | 0 | 0      |
| PTPN11  | MAPK14   | 1852389 | 1843222 | 9606. ENSI | 9606. ENSI | 0 | 0 | 0 | 0      |
| RAF1    | MAPK1    | 1844086 | 1842512 | 9606. ENSI | 9606. ENSI | 0 | 0 | 0 | 0. 639 |
| RAF1    | CCND1    | 1844086 | 1843117 | 9606. ENSI | 9606. ENSI | 0 | 0 | 0 | 0      |
| REN     | SERPINE1 | 1846232 | 1842959 | 9606. ENSI | 9606. ENSI | 0 | 0 | 0 | 0      |
| REN     | IL6      | 1846232 | 1844631 | 9606. ENSI | 9606. ENSI | 0 | 0 | 0 | 0      |
| RET     | STAT3    | 1853238 | 1845584 | 9606. ENSI | 9606. ENSI | 0 | 0 | 0 | 0      |
| RET     | HRAS     | 1853238 | 1849235 | 9606. ENSI | 9606. ENSI | 0 | 0 | 0 | 0      |
| RET     | PTPN11   | 1853238 | 1852389 | 9606. ENSI | 9606. ENSI | 0 | 0 | 0 | 0      |
| RET     | PIK3CA   | 1853238 | 1845446 | 9606. ENSI | 9606. ENSI | 0 | 0 | 0 | 0      |
| RET     | IRS1     | 1853238 | 1848682 | 9606. ENSI | 9606. ENSI | 0 | 0 | 0 | 0      |
| RET     | MAPK1    | 1853238 | 1842512 | 9606. ENSI | 9606. ENSI | 0 | 0 | 0 | 0. 628 |
| RICTOR  | RPS6KB1  | 1853522 | 1843035 | 9606. ENSI | 9606. ENSI | 0 | 0 | 0 | 0      |
| RICTOR  | AKT1     | 1853522 | 1846136 | 9606. ENSI | 9606. ENSI | 0 | 0 | 0 | 0      |
| RICTOR  | EIF4EBP1 | 1853522 | 1852358 | 9606. ENSI | 9606. ENSI | 0 | 0 | 0 | 0      |
| RICTOR  | RPTOR    | 1853522 | 1848942 | 9606. ENSI | 9606. ENSI | 0 | 0 | 0 | 0      |
| RPS6KB1 | MAPK1    | 1843035 | 1842512 | 9606. ENSI | 9606. ENSI | 0 | 0 | 0 | 0. 686 |
| RPTOR   | RPS6KB1  | 1848942 | 1843035 | 9606. ENSI | 9606. ENSI | 0 | 0 | 0 | 0      |
| RPTOR   | IRS1     | 1848942 | 1848682 | 9606. ENSI | 9606. ENSI | 0 | 0 | 0 | 0      |
| RPTOR   | AKT1     | 1848942 | 1846136 | 9606. ENSI | 9606. ENSI | 0 | 0 | 0 | 0      |
| RPTOR   | MAPK1    | 1848942 | 1842512 | 9606. ENSI | 9606. ENSI | 0 | 0 | 0 | 0      |
| S1PR1   | AKT1     | 1848727 | 1846136 | 9606. ENSI | 9606. ENSI | 0 | 0 | 0 | 0      |
| S1PR1   | KDR      | 1848727 | 1845437 | 9606. ENSI | 9606. ENSI | 0 | 0 | 0 | 0      |
| S1PR1   | PDGFRB   | 1848727 | 1844996 | 9606. ENSI | 9606. ENSI | 0 | 0 | 0 | 0      |
| S1PR1   | CCR5     | 1848727 | 1847342 | 9606. ENSI | 9606. ENSI | 0 | 0 | 0 | 0      |
| S1PR1   | PIK3CA   | 1848727 | 1845446 | 9606. ENSI | 9606. ENSI | 0 | 0 | 0 | 0      |
| S1PR1   | MAPK1    | 1848727 | 1842512 | 9606. ENSI | 9606. ENSI | 0 | 0 | 0 | 0      |
| S1PR1   | APP      | 1848727 | 1846936 | 9606. ENSI | 9606. ENSI | 0 | 0 | 0 | 0      |
| SHC1    | JAK2     | 1860266 | 1857411 | 9606. ENSI | 9606. ENSI | 0 | 0 | 0 | 0      |
| SHC1    | KDR      | 1860266 | 1845437 | 9606. ENSI | 9606. ENSI | 0 | 0 | 0 | 0      |
| SHC1    | RET      | 1860266 | 1853238 | 9606. ENSI | 9606. ENSI | 0 | 0 | 0 | 0      |
| SHC1    | INSR     | 1860266 | 1848574 | 9606. ENSI | 9606. ENSI | 0 | 0 | 0 | 0      |
| SHC1    | FLT4     | 1860266 | 1845029 | 9606. ENSI | 9606. ENSI | 0 | 0 | 0 | 0      |
| SHC1    | EGFR     | 1860266 | 1846445 | 9606. ENSI | 9606. ENSI | 0 | 0 | 0 | 0      |
| SHC1    | IRS1     | 1860266 | 1848682 | 9606. ENSI | 9606. ENSI | 0 | 0 | 0 | 0      |
| SHC1    | FLT1     | 1860266 | 1846791 | 9606. ENSI | 9606. ENSI | 0 | 0 | 0 | 0      |
| SHC1    | SYK      | 1860266 | 1856371 | 9606. ENSI | 9606. ENSI | 0 | 0 | 0 | 0      |
| SHC1    | PDGFRB   | 1860266 | 1844996 | 9606. ENSI | 9606. ENSI | 0 | 0 | 0 | 0      |
| SHC1    | KIT      | 1860266 | 1847112 | 9606. ENSI | 9606. ENSI | 0 | 0 | 0 | 0      |
| SHC1    | MAPK1    | 1860266 | 1842512 | 9606. ENSI | 9606. ENSI | 0 | 0 | 0 | 0      |
| SHC1    | FGFR1    | 1860266 | 1859710 | 9606. ENSI | 9606. ENSI | 0 | 0 | 0 | 0      |
| SHC1    | MAPK14   | 1860266 | 1843222 | 9606. ENSI | 9606. ENSI | 0 | 0 | 0 | 0      |
| SHC1    | AKT1     | 1860266 | 1846136 | 9606. ENSI | 9606. ENSI | 0 | 0 | 0 | 0      |
| SHC1    | PTPN11   | 1860266 | 1852389 | 9606. ENSI | 9606. ENSI | 0 | 0 | 0 | 0. 614 |
| SHC1    | ITGB3    | 1860266 | 1845040 | 9606. ENSI | 9606. ENSI | 0 | 0 | 0 | 0      |
| SHC1    | HRAS     | 1860266 | 1849235 | 9606. ENSI | 9606. ENSI | 0 | 0 | 0 | 0      |
| SHC1    | PIK3CA   | 1860266 | 1845446 | 9606. ENSI | 9606. ENSI | 0 | 0 | 0 | 0      |
| SHC1    | IL6      | 1860266 | 1844631 | 9606. ENSI | 9606. ENSI | 0 | 0 | 0 | 0      |
| SHC1    | APP      | 1860266 | 1846936 | 9606. ENSI | 9606. ENSI | 0 | 0 | 0 | 0      |
| SHC1    | TGFBR1   | 1860266 | 1856216 | 9606. ENSI | 9606. ENSI | 0 | 0 | 0 | 0      |
| SHC1    | ITGB1    | 1860266 | 1848520 | 9606. ENSI | 9606. ENSI | 0 | 0 | 0 | 0      |
| SHC1    | S1PR1    | 1860266 | 1848727 | 9606. ENSI | 9606. ENSI | 0 | 0 | 0 | 0      |
| SHC1    | ESR1     | 1860266 | 1842435 | 9606. ENSI | 9606. ENSI | 0 | 0 | 0 | 0      |
| SHC1    | TP53     | 1860266 | 1846083 | 9606. ENSI | 9606. ENSI | 0 | 0 | 0 | 0      |

|        |          |         |         |            |            |   |   |   |        |
|--------|----------|---------|---------|------------|------------|---|---|---|--------|
| SHC1   | HLA-DRB1 | 1860266 | 1853944 | 9606. ENSI | 9606. ENSI | 0 | 0 | 0 | 0      |
| SHH    | EGFR     | 1847842 | 1846445 | 9606. ENSI | 9606. ENSI | 0 | 0 | 0 | 0      |
| SHH    | CCND1    | 1847842 | 1843117 | 9606. ENSI | 9606. ENSI | 0 | 0 | 0 | 0      |
| SHH    | AKT1     | 1847842 | 1846136 | 9606. ENSI | 9606. ENSI | 0 | 0 | 0 | 0      |
| SHH    | TP53     | 1847842 | 1846083 | 9606. ENSI | 9606. ENSI | 0 | 0 | 0 | 0      |
| STAT3  | CCND1    | 1845584 | 1843117 | 9606. ENSI | 9606. ENSI | 0 | 0 | 0 | 0      |
| STAT3  | PDGFRB   | 1845584 | 1844996 | 9606. ENSI | 9606. ENSI | 0 | 0 | 0 | 0      |
| STAT3  | IL6      | 1845584 | 1844631 | 9606. ENSI | 9606. ENSI | 0 | 0 | 0 | 0      |
| STAT3  | MAPK1    | 1845584 | 1842512 | 9606. ENSI | 9606. ENSI | 0 | 0 | 0 | 0      |
| STAT3  | MAPK14   | 1845584 | 1843222 | 9606. ENSI | 9606. ENSI | 0 | 0 | 0 | 0      |
| STAT3  | RAF1     | 1845584 | 1844086 | 9606. ENSI | 9606. ENSI | 0 | 0 | 0 | 0      |
| STAT3  | PIK3CA   | 1845584 | 1845446 | 9606. ENSI | 9606. ENSI | 0 | 0 | 0 | 0      |
| STAT3  | MMP2     | 1845584 | 1842719 | 9606. ENSI | 9606. ENSI | 0 | 0 | 0 | 0      |
| STAT3  | IL1B     | 1845584 | 1845335 | 9606. ENSI | 9606. ENSI | 0 | 0 | 0 | 0      |
| SYK    | STAT3    | 1856371 | 1845584 | 9606. ENSI | 9606. ENSI | 0 | 0 | 0 | 0      |
| SYK    | PIK3CG   | 1856371 | 1853801 | 9606. ENSI | 9606. ENSI | 0 | 0 | 0 | 0      |
| SYK    | ITGB3    | 1856371 | 1845040 | 9606. ENSI | 9606. ENSI | 0 | 0 | 0 | 0      |
| SYK    | PTPN11   | 1856371 | 1852389 | 9606. ENSI | 9606. ENSI | 0 | 0 | 0 | 0. 615 |
| SYK    | MAPK14   | 1856371 | 1843222 | 9606. ENSI | 9606. ENSI | 0 | 0 | 0 | 0. 631 |
| SYK    | PIK3CA   | 1856371 | 1845446 | 9606. ENSI | 9606. ENSI | 0 | 0 | 0 | 0      |
| SYK    | MAPT     | 1856371 | 1852372 | 9606. ENSI | 9606. ENSI | 0 | 0 | 0 | 0      |
| TBXA2R | ADRA1B   | 1859713 | 1848870 | 9606. ENSI | 9606. ENSI | 0 | 0 | 0 | 0      |
| TBXA2R | ADRA1D   | 1859713 | 1857034 | 9606. ENSI | 9606. ENSI | 0 | 0 | 0 | 0      |
| TBXA2R | F2R      | 1859713 | 1850333 | 9606. ENSI | 9606. ENSI | 0 | 0 | 0 | 0      |
| TBXA2R | PTGIR    | 1859713 | 1847278 | 9606. ENSI | 9606. ENSI | 0 | 0 | 0 | 0. 724 |
| TBXA2R | EDNRB    | 1859713 | 1856642 | 9606. ENSI | 9606. ENSI | 0 | 0 | 0 | 0      |
| TBXA2R | HTR2A    | 1859713 | 1856916 | 9606. ENSI | 9606. ENSI | 0 | 0 | 0 | 0      |
| TBXA2R | AGTR1    | 1859713 | 1846323 | 9606. ENSI | 9606. ENSI | 0 | 0 | 0 | 0      |
| TBXA2R | SYK      | 1859713 | 1856371 | 9606. ENSI | 9606. ENSI | 0 | 0 | 0 | 0      |
| TBXA2R | EDNRA    | 1859713 | 1849748 | 9606. ENSI | 9606. ENSI | 0 | 0 | 0 | 0      |
| TBXA2R | PTGER1   | 1859713 | 1847360 | 9606. ENSI | 9606. ENSI | 0 | 0 | 0 | 0. 66  |
| TBXA2R | BDKRB2   | 1859713 | 1848988 | 9606. ENSI | 9606. ENSI | 0 | 0 | 0 | 0      |
| TBXA2R | CHRM1    | 1859713 | 1848849 | 9606. ENSI | 9606. ENSI | 0 | 0 | 0 | 0      |
| TBXA2R | PRKCH    | 1859713 | 1851111 | 9606. ENSI | 9606. ENSI | 0 | 0 | 0 | 0      |
| TBXA2R | HTR2B    | 1859713 | 1844597 | 9606. ENSI | 9606. ENSI | 0 | 0 | 0 | 0      |
| TBXA2R | APP      | 1859713 | 1846936 | 9606. ENSI | 9606. ENSI | 0 | 0 | 0 | 0      |
| TBXA2R | PIK3CA   | 1859713 | 1845446 | 9606. ENSI | 9606. ENSI | 0 | 0 | 0 | 0      |
| TBXA2R | FFAR1    | 1859713 | 1843825 | 9606. ENSI | 9606. ENSI | 0 | 0 | 0 | 0      |
| TBXA2R | ADRA1A   | 1859713 | 1857247 | 9606. ENSI | 9606. ENSI | 0 | 0 | 0 | 0      |
| TERT   | AKT1     | 1849199 | 1846136 | 9606. ENSI | 9606. ENSI | 0 | 0 | 0 | 0      |
| TERT   | TP53     | 1849199 | 1846083 | 9606. ENSI | 9606. ENSI | 0 | 0 | 0 | 0      |
| TERT   | RPS6KB1  | 1849199 | 1843035 | 9606. ENSI | 9606. ENSI | 0 | 0 | 0 | 0      |
| TERT   | CCND1    | 1849199 | 1843117 | 9606. ENSI | 9606. ENSI | 0 | 0 | 0 | 0      |
| TERT   | ESR1     | 1849199 | 1842435 | 9606. ENSI | 9606. ENSI | 0 | 0 | 0 | 0      |
| TERT   | EGFR     | 1849199 | 1846445 | 9606. ENSI | 9606. ENSI | 0 | 0 | 0 | 0      |
| TERT   | MAPK1    | 1849199 | 1842512 | 9606. ENSI | 9606. ENSI | 0 | 0 | 0 | 0      |
| TGFBR1 | SERPINE1 | 1856216 | 1842959 | 9606. ENSI | 9606. ENSI | 0 | 0 | 0 | 0      |
| TGFBR1 | RPS6KB1  | 1856216 | 1843035 | 9606. ENSI | 9606. ENSI | 0 | 0 | 0 | 0. 617 |
| THRA   | ESR1     | 1845577 | 1842435 | 9606. ENSI | 9606. ENSI | 0 | 0 | 0 | 0. 653 |
| THRA   | PPARA    | 1845577 | 1845205 | 9606. ENSI | 9606. ENSI | 0 | 0 | 0 | 0. 685 |
| THRA   | NR1H2    | 1845577 | 1844246 | 9606. ENSI | 9606. ENSI | 0 | 0 | 0 | 0. 748 |
| TNF    | MMP9     | 1860103 | 1855661 | 9606. ENSI | 9606. ENSI | 0 | 0 | 0 | 0      |
| TNF    | PTGS2    | 1860103 | 1854602 | 9606. ENSI | 9606. ENSI | 0 | 0 | 0 | 0      |
| TNF    | IL1B     | 1860103 | 1845335 | 9606. ENSI | 9606. ENSI | 0 | 0 | 0 | 0      |

|       |          |         |         |            |            |   |   |   |        |
|-------|----------|---------|---------|------------|------------|---|---|---|--------|
| TNF   | BCL2     | 1860103 | 1851168 | 9606. ENSI | 9606. ENSI | 0 | 0 | 0 | 0      |
| TNF   | AKT1     | 1860103 | 1846136 | 9606. ENSI | 9606. ENSI | 0 | 0 | 0 | 0      |
| TNF   | TP53     | 1860103 | 1846083 | 9606. ENSI | 9606. ENSI | 0 | 0 | 0 | 0      |
| TNF   | IRS1     | 1860103 | 1848682 | 9606. ENSI | 9606. ENSI | 0 | 0 | 0 | 0      |
| TNNT2 | TNNI3    | 1854566 | 1852512 | 9606. ENSI | 9606. ENSI | 0 | 0 | 0 | 0      |
| TP53  | MAPK14   | 1846083 | 1843222 | 9606. ENSI | 9606. ENSI | 0 | 0 | 0 | 0      |
| TP53  | MAPK1    | 1846083 | 1842512 | 9606. ENSI | 9606. ENSI | 0 | 0 | 0 | 0      |
| TP53  | CSNK2A1  | 1846083 | 1842650 | 9606. ENSI | 9606. ENSI | 0 | 0 | 0 | 0      |
| TP53  | MMP2     | 1846083 | 1842719 | 9606. ENSI | 9606. ENSI | 0 | 0 | 0 | 0      |
| TP53  | ABCB1    | 1846083 | 1845794 | 9606. ENSI | 9606. ENSI | 0 | 0 | 0 | 0      |
| TP53  | SERPINE1 | 1846083 | 1842959 | 9606. ENSI | 9606. ENSI | 0 | 0 | 0 | 0      |
| TP53  | CDK4     | 1846083 | 1844551 | 9606. ENSI | 9606. ENSI | 0 | 0 | 0 | 0      |
| TP53  | CCND1    | 1846083 | 1843117 | 9606. ENSI | 9606. ENSI | 0 | 0 | 0 | 0      |
| TP53  | VHL      | 1846083 | 1844441 | 9606. ENSI | 9606. ENSI | 0 | 0 | 0 | 0      |
| TP53  | ESR1     | 1846083 | 1842435 | 9606. ENSI | 9606. ENSI | 0 | 0 | 0 | 0      |
| TP53  | STAT3    | 1846083 | 1845584 | 9606. ENSI | 9606. ENSI | 0 | 0 | 0 | 0      |
| TP53  | CTSD     | 1846083 | 1843439 | 9606. ENSI | 9606. ENSI | 0 | 0 | 0 | 0      |
| TP53  | NR3C1    | 1846083 | 1843294 | 9606. ENSI | 9606. ENSI | 0 | 0 | 0 | 0      |
| TP53  | PIK3CA   | 1846083 | 1845446 | 9606. ENSI | 9606. ENSI | 0 | 0 | 0 | 0      |
| TP53  | IL6      | 1846083 | 1844631 | 9606. ENSI | 9606. ENSI | 0 | 0 | 0 | 0      |
| TRPV1 | EGFR     | 1858755 | 1846445 | 9606. ENSI | 9606. ENSI | 0 | 0 | 0 | 0      |
| TRPV1 | MMP1     | 1858755 | 1850481 | 9606. ENSI | 9606. ENSI | 0 | 0 | 0 | 0      |
| TSHR  | STAT3    | 1847934 | 1845584 | 9606. ENSI | 9606. ENSI | 0 | 0 | 0 | 0      |
| TSHR  | PTGIR    | 1847934 | 1847278 | 9606. ENSI | 9606. ENSI | 0 | 0 | 0 | 0      |
| VDR   | TP53     | 1862386 | 1846083 | 9606. ENSI | 9606. ENSI | 0 | 0 | 0 | 0      |
| VDR   | ESR1     | 1862386 | 1842435 | 9606. ENSI | 9606. ENSI | 0 | 0 | 0 | 0. 649 |
| VDR   | AR       | 1862386 | 1856164 | 9606. ENSI | 9606. ENSI | 0 | 0 | 0 | 0. 632 |
| VDR   | PPARA    | 1862386 | 1845205 | 9606. ENSI | 9606. ENSI | 0 | 0 | 0 | 0. 701 |
| VDR   | ESR2     | 1862386 | 1852756 | 9606. ENSI | 9606. ENSI | 0 | 0 | 0 | 0. 644 |
| VDR   | PPARG    | 1862386 | 1847090 | 9606. ENSI | 9606. ENSI | 0 | 0 | 0 | 0. 715 |
| VDR   | THRA     | 1862386 | 1845577 | 9606. ENSI | 9606. ENSI | 0 | 0 | 0 | 0. 695 |
| VDR   | NR1H2    | 1862386 | 1844246 | 9606. ENSI | 9606. ENSI | 0 | 0 | 0 | 0. 695 |
| VDR   | PPARD    | 1862386 | 1849364 | 9606. ENSI | 9606. ENSI | 0 | 0 | 0 | 0. 706 |

| coexpress | experiment | database | automatic | prediction | combined_score |
|-----------|------------|----------|-----------|------------|----------------|
| 0         | 0          | 0.9      | 0.909     | 0          | 0.99           |
| 0         | 0          | 0.9      | 0.946     | 0          | 0.994          |
| 0         | 0          | 0.9      | 0.96      | 0          | 0.926          |
| 0         | 0          | 0.9      | 0.07      | 0          | 0.903          |
| 0         | 0.57       | 0.9      | 0.904     | 0          | 0.957          |
| 0         | 0.57       | 0.9      | 0.332     | 0          | 0.955          |
| 0         | 0          | 0.9      | 0.351     | 0          | 0.911          |
| 0         | 0          | 0.9      | 0.25      | 0          | 0.907          |
| 0         | 0          | 0.9      | 0.285     | 0          | 0.906          |
| 0         | 0          | 0.9      | 0.191     | 0          | 0.904          |
| 0         | 0          | 0.9      | 0.123     | 0          | 0.903          |
| 0         | 0          | 0.9      | 0.065     | 0          | 0.902          |
| 0         | 0          | 0.9      | 0.097     | 0          | 0.902          |
| 0         | 0          | 0.9      | 0         | 0          | 0.9            |
| 0         | 0          | 0.9      | 0         | 0          | 0.9            |
| 0         | 0          | 0.9      | 0         | 0          | 0.9            |
| 0         | 0          | 0.9      | 0         | 0          | 0.9            |
| 0         | 0          | 0.9      | 0         | 0          | 0.9            |
| 0         | 0          | 0.9      | 0.729     | 0          | 0.913          |
| 0         | 0          | 0.9      | 0.163     | 0          | 0.912          |
| 0         | 0          | 0.9      | 0.234     | 0          | 0.907          |
| 0         | 0          | 0.9      | 0.262     | 0          | 0.906          |
| 0         | 0          | 0.9      | 0.178     | 0          | 0.905          |
| 0         | 0          | 0.9      | 0.177     | 0          | 0.904          |
| 0         | 0          | 0.9      | 0.065     | 0          | 0.902          |
| 0         | 0          | 0.9      | 0.053     | 0          | 0.9            |
| 0         | 0          | 0.9      | 0         | 0          | 0.9            |
| 0         | 0          | 0.9      | 0         | 0          | 0.9            |
| 0         | 0          | 0.9      | 0.269     | 0          | 0.907          |
| 0         | 0          | 0.9      | 0.274     | 0          | 0.907          |
| 0         | 0          | 0.9      | 0.228     | 0          | 0.906          |
| 0         | 0          | 0.9      | 0.243     | 0          | 0.905          |
| 0         | 0          | 0.9      | 0.094     | 0          | 0.905          |
| 0         | 0          | 0.9      | 0.748     | 0          | 0.904          |
| 0         | 0          | 0.9      | 0.074     | 0          | 0.903          |
| 0         | 0          | 0.9      | 0.121     | 0          | 0.903          |
| 0         | 0          | 0.9      | 0.065     | 0          | 0.902          |
| 0         | 0          | 0.9      | 0         | 0          | 0.9            |
| 0         | 0          | 0.9      | 0         | 0          | 0.9            |
| 0         | 0          | 0.9      | 0         | 0          | 0.9            |
| 0         | 0          | 0.9      | 0         | 0          | 0.9            |
| 0         | 0          | 0.9      | 0.398     | 0          | 0.91           |
| 0         | 0          | 0.9      | 0.308     | 0          | 0.905          |
| 0         | 0          | 0.9      | 0.199     | 0          | 0.904          |
| 0         | 0          | 0.9      | 0         | 0          | 0.9            |
| 0         | 0          | 0.9      | 0.047     | 0          | 0.9            |
| 0         | 0          | 0.9      | 0         | 0          | 0.9            |
| 0         | 0          | 0.9      | 0         | 0          | 0.9            |
| 0         | 0.149      | 0.9      | 0.876     | 0          | 0.915          |
| 0         | 0          | 0.9      | 0.064     | 0          | 0.902          |
| 0         | 0          | 0.9      | 0         | 0          | 0.9            |
| 0         | 0.576      | 0.9      | 0.075     | 0          | 0.957          |
| 0         | 0.16       | 0.9      | 0.306     | 0          | 0.936          |

|       |       |     |       |   |       |
|-------|-------|-----|-------|---|-------|
| 0     | 0.564 | 0   | 0.806 | 0 | 0.911 |
| 0     | 0     | 0.9 | 0.213 | 0 | 0.906 |
| 0     | 0     | 0.9 | 0.252 | 0 | 0.906 |
| 0     | 0     | 0.9 | 0.045 | 0 | 0.9   |
| 0     | 0.576 | 0.9 | 0.14  | 0 | 0.957 |
| 0     | 0     | 0.9 | 0     | 0 | 0.9   |
| 0     | 0     | 0.9 | 0     | 0 | 0.9   |
| 0     | 0.668 | 0.9 | 0.991 | 0 | 0.999 |
| 0     | 0.576 | 0.9 | 0.96  | 0 | 0.998 |
| 0     | 0.984 | 0.9 | 0.989 | 0 | 0.998 |
| 0.117 | 0.969 | 0.9 | 0.993 | 0 | 0.997 |
| 0     | 0     | 0   | 0.976 | 0 | 0.977 |
| 0     | 0     | 0   | 0.974 | 0 | 0.975 |
| 0     | 0     | 0   | 0.973 | 0 | 0.974 |
| 0     | 0.576 | 0.9 | 0.38  | 0 | 0.971 |
| 0     | 0.945 | 0   | 0.976 | 0 | 0.963 |
| 0     | 0     | 0   | 0.949 | 0 | 0.949 |
| 0     | 0     | 0   | 0.946 | 0 | 0.947 |
| 0     | 0.101 | 0.9 | 0.95  | 0 | 0.94  |
| 0     | 0     | 0   | 0.923 | 0 | 0.923 |
| 0     | 0     | 0.9 | 0.937 | 0 | 0.993 |
| 0     | 0     | 0   | 0.96  | 0 | 0.96  |
| 0     | 0.053 | 0.9 | 0.581 | 0 | 0.956 |
| 0     | 0     | 0   | 0.926 | 0 | 0.926 |
| 0     | 0     | 0   | 0.923 | 0 | 0.923 |
| 0     | 0     | 0   | 0.901 | 0 | 0.902 |
| 0     | 0.591 | 0   | 0.973 | 0 | 0.988 |
| 0     | 0     | 0.9 | 0.719 | 0 | 0.97  |
| 0     | 0     | 0.9 | 0.276 | 0 | 0.924 |
| 0     | 0     | 0.9 | 0.206 | 0 | 0.917 |
| 0     | 0     | 0.9 | 0.197 | 0 | 0.916 |
| 0     | 0     | 0.9 | 0.176 | 0 | 0.914 |
| 0     | 0     | 0.9 | 0.173 | 0 | 0.913 |
| 0     | 0     | 0.9 | 0     | 0 | 0.9   |
| 0     | 0     | 0.9 | 0     | 0 | 0.9   |
| 0     | 0.812 | 0.9 | 0.937 | 0 | 0.998 |
| 0     | 0.926 | 0   | 0.938 | 0 | 0.995 |
| 0     | 0.914 | 0   | 0.942 | 0 | 0.994 |
| 0     | 0.917 | 0   | 0.913 | 0 | 0.992 |
| 0     | 0.879 | 0.9 | 0.405 | 0 | 0.992 |
| 0     | 0.812 | 0   | 0.943 | 0 | 0.988 |
| 0     | 0.576 | 0.9 | 0.908 | 0 | 0.968 |
| 0     | 0.576 | 0.9 | 0.198 | 0 | 0.963 |
| 0     | 0.576 | 0.9 | 0.889 | 0 | 0.962 |
| 0     | 0.097 | 0.9 | 0.479 | 0 | 0.948 |
| 0     | 0     | 0.9 | 0.342 | 0 | 0.931 |
| 0     | 0.099 | 0.9 | 0.266 | 0 | 0.928 |
| 0     | 0     | 0   | 0.923 | 0 | 0.923 |
| 0     | 0     | 0.9 | 0.729 | 0 | 0.921 |
| 0     | 0     | 0.9 | 0.565 | 0 | 0.92  |
| 0     | 0     | 0.9 | 0.581 | 0 | 0.92  |
| 0     | 0     | 0.9 | 0.416 | 0 | 0.914 |
| 0     | 0     | 0.9 | 0.243 | 0 | 0.907 |
| 0     | 0     | 0.9 | 0.191 | 0 | 0.905 |



|       |       |     |       |   |       |
|-------|-------|-----|-------|---|-------|
| 0     | 0.983 | 0   | 0.953 | 0 | 0.999 |
| 0     | 0.983 | 0.9 | 0.989 | 0 | 0.999 |
| 0     | 0     | 0.9 | 0.981 | 0 | 0.998 |
| 0     | 0.807 | 0.9 | 0.898 | 0 | 0.997 |
| 0     | 0.564 | 0   | 0.945 | 0 | 0.975 |
| 0     | 0     | 0   | 0.974 | 0 | 0.974 |
| 0     | 0.576 | 0   | 0.941 | 0 | 0.974 |
| 0     | 0.576 | 0   | 0.919 | 0 | 0.964 |
| 0     | 0.576 | 0   | 0.896 | 0 | 0.954 |
| 0     | 0     | 0   | 0.943 | 0 | 0.943 |
| 0     | 0     | 0   | 0.942 | 0 | 0.942 |
| 0     | 0     | 0   | 0.928 | 0 | 0.929 |
| 0     | 0.576 | 0.9 | 0.503 | 0 | 0.959 |
| 0     | 0     | 0.9 | 0.243 | 0 | 0.921 |
| 0     | 0     | 0.9 | 0.126 | 0 | 0.908 |
| 0     | 0     | 0.9 | 0.105 | 0 | 0.906 |
| 0     | 0     | 0.9 | 0.126 | 0 | 0.902 |
| 0     | 0     | 0.9 | 0     | 0 | 0.9   |
| 0     | 0     | 0.9 | 0     | 0 | 0.9   |
| 0     | 0     | 0.9 | 0     | 0 | 0.9   |
| 0     | 0     | 0.9 | 0     | 0 | 0.9   |
| 0     | 0     | 0.9 | 0     | 0 | 0.9   |
| 0     | 0     | 0.9 | 0     | 0 | 0.9   |
| 0     | 0.999 | 0.9 | 0.636 | 0 | 0.999 |
| 0.071 | 0.871 | 0.9 | 0.767 | 0 | 0.99  |
| 0     | 0.938 | 0   | 0.964 | 0 | 0.959 |
| 0     | 0.101 | 0.9 | 0     | 0 | 0.906 |
| 0     | 0.929 | 0   | 0.938 | 0 | 0.995 |
| 0     | 0.569 | 0.9 | 0.543 | 0 | 0.978 |
| 0     | 0.576 | 0.9 | 0.217 | 0 | 0.963 |
| 0.088 | 0.569 | 0   | 0.911 | 0 | 0.962 |
| 0     | 0     | 0.9 | 0.151 | 0 | 0.911 |
| 0     | 0     | 0.9 | 0.674 | 0 | 0.966 |
| 0     | 0     | 0.9 | 0.323 | 0 | 0.929 |
| 0     | 0     | 0.9 | 0.28  | 0 | 0.925 |
| 0     | 0     | 0.9 | 0.257 | 0 | 0.922 |
| 0     | 0     | 0.9 | 0.203 | 0 | 0.916 |
| 0     | 0     | 0.9 | 0.202 | 0 | 0.916 |
| 0     | 0     | 0.9 | 0.19  | 0 | 0.915 |
| 0     | 0     | 0.9 | 0.19  | 0 | 0.915 |
| 0     | 0     | 0.9 | 0.185 | 0 | 0.915 |
| 0     | 0     | 0.9 | 0.18  | 0 | 0.914 |
| 0     | 0     | 0.9 | 0.167 | 0 | 0.913 |
| 0     | 0     | 0.9 | 0.159 | 0 | 0.912 |
| 0     | 0     | 0.9 | 0.139 | 0 | 0.91  |
| 0     | 0     | 0.9 | 0.123 | 0 | 0.908 |
| 0     | 0     | 0.9 | 0.101 | 0 | 0.906 |
| 0     | 0     | 0.9 | 0.1   | 0 | 0.906 |
| 0     | 0     | 0.9 | 0.089 | 0 | 0.905 |
| 0     | 0     | 0.9 | 0.073 | 0 | 0.903 |
| 0     | 0     | 0.9 | 0.063 | 0 | 0.902 |
| 0     | 0     | 0.9 | 0.063 | 0 | 0.902 |
| 0     | 0     | 0.9 | 0     | 0 | 0.9   |
| 0     | 0     | 0.9 | 0     | 0 | 0.9   |

|       |       |     |       |   |       |
|-------|-------|-----|-------|---|-------|
| 0     | 0.917 | 0.9 | 0.96  | 0 | 0.999 |
| 0     | 0.573 | 0   | 0.882 | 0 | 0.947 |
| 0     | 0.803 | 0   | 0.846 | 0 | 0.968 |
| 0     | 0     | 0.9 | 0.163 | 0 | 0.912 |
| 0     | 0     | 0.9 | 0     | 0 | 0.9   |
| 0     | 0.999 | 0.9 | 0.995 | 0 | 0.999 |
| 0     | 0     | 0.9 | 0.086 | 0 | 0.904 |
| 0     | 0.999 | 0.9 | 0.993 | 0 | 0.999 |
| 0     | 0.842 | 0.9 | 0.987 | 0 | 0.984 |
| 0     | 0     | 0.9 | 0.155 | 0 | 0.911 |
| 0     | 0     | 0.9 | 0.372 | 0 | 0.91  |
| 0     | 0     | 0.9 | 0.136 | 0 | 0.909 |
| 0     | 0     | 0.9 | 0.102 | 0 | 0.906 |
| 0     | 0     | 0.9 | 0.191 | 0 | 0.905 |
| 0     | 0     | 0.9 | 0.196 | 0 | 0.905 |
| 0     | 0     | 0.9 | 0.169 | 0 | 0.904 |
| 0     | 0     | 0.9 | 0.073 | 0 | 0.903 |
| 0     | 0     | 0.9 | 0.073 | 0 | 0.903 |
| 0     | 0     | 0.9 | 0     | 0 | 0.9   |
| 0     | 0     | 0.9 | 0.109 | 0 | 0.907 |
| 0     | 0     | 0.9 | 0.188 | 0 | 0.905 |
| 0     | 0     | 0.9 | 0.073 | 0 | 0.903 |
| 0     | 0     | 0.9 | 0.071 | 0 | 0.903 |
| 0.071 | 0     | 0.9 | 0.7   | 0 | 0.969 |
| 0     | 0     | 0.9 | 0.321 | 0 | 0.929 |
| 0     | 0     | 0.9 | 0.652 | 0 | 0.924 |
| 0     | 0     | 0   | 0.956 | 0 | 0.957 |
| 0     | 0     | 0.9 | 0.898 | 0 | 0.945 |
| 0     | 0     | 0.9 | 0.867 | 0 | 0.932 |
| 0     | 0     | 0   | 0.91  | 0 | 0.91  |
| 0     | 0.361 | 0.9 | 0.43  | 0 | 0.96  |
| 0     | 0     | 0   | 0.911 | 0 | 0.911 |
| 0     | 0     | 0.9 | 0.405 | 0 | 0.938 |
| 0     | 0     | 0   | 0.926 | 0 | 0.926 |
| 0     | 0     | 0.9 | 0.12  | 0 | 0.908 |
| 0     | 0.576 | 0.8 | 0.829 | 0 | 0.984 |
| 0     | 0     | 0.9 | 0.434 | 0 | 0.911 |
| 0     | 0     | 0.9 | 0.091 | 0 | 0.905 |
| 0     | 0     | 0.9 | 0.084 | 0 | 0.904 |
| 0     | 0     | 0.9 | 0.159 | 0 | 0.904 |
| 0     | 0     | 0.9 | 0     | 0 | 0.9   |
| 0     | 0     | 0.9 | 0.324 | 0 | 0.908 |
| 0     | 0     | 0.9 | 0.181 | 0 | 0.905 |
| 0     | 0     | 0.9 | 0.888 | 0 | 0.904 |
| 0     | 0     | 0.9 | 0.074 | 0 | 0.903 |
| 0     | 0     | 0.9 | 0.055 | 0 | 0.901 |
| 0     | 0     | 0.9 | 0.046 | 0 | 0.9   |
| 0     | 0     | 0.9 | 0.359 | 0 | 0.933 |
| 0     | 0     | 0.9 | 0.33  | 0 | 0.93  |
| 0     | 0     | 0.9 | 0.198 | 0 | 0.916 |
| 0     | 0     | 0.9 | 0.452 | 0 | 0.914 |
| 0     | 0     | 0.9 | 0.113 | 0 | 0.907 |
| 0     | 0     | 0.9 | 0.18  | 0 | 0.905 |
| 0     | 0     | 0.9 | 0.172 | 0 | 0.905 |

|       |       |     |       |   |       |
|-------|-------|-----|-------|---|-------|
| 0     | 0     | 0.9 | 0.073 | 0 | 0.903 |
| 0     | 0     | 0.9 | 0.053 | 0 | 0.9   |
| 0     | 0     | 0.9 | 0     | 0 | 0.9   |
| 0     | 0     | 0.9 | 0     | 0 | 0.9   |
| 0     | 0     | 0.9 | 0.223 | 0 | 0.918 |
| 0     | 0     | 0.9 | 0.418 | 0 | 0.913 |
| 0     | 0     | 0.9 | 0.35  | 0 | 0.912 |
| 0     | 0     | 0.9 | 0.163 | 0 | 0.912 |
| 0     | 0     | 0.9 | 0.326 | 0 | 0.911 |
| 0     | 0     | 0.9 | 0.312 | 0 | 0.91  |
| 0     | 0     | 0.9 | 0.092 | 0 | 0.905 |
| 0     | 0     | 0.9 | 0.947 | 0 | 0.904 |
| 0     | 0     | 0.9 | 0.146 | 0 | 0.904 |
| 0     | 0     | 0.9 | 0.073 | 0 | 0.903 |
| 0     | 0     | 0.9 | 0     | 0 | 0.9   |
| 0     | 0     | 0.9 | 0     | 0 | 0.9   |
| 0     | 0.999 | 0.9 | 0.985 | 0 | 0.999 |
| 0     | 0     | 0.9 | 0.974 | 0 | 0.997 |
| 0     | 0.924 | 0   | 0.973 | 0 | 0.997 |
| 0     | 0     | 0.9 | 0.891 | 0 | 0.988 |
| 0     | 0.693 | 0.9 | 0.855 | 0 | 0.978 |
| 0     | 0     | 0   | 0.963 | 0 | 0.963 |
| 0     | 0     | 0.9 | 0.625 | 0 | 0.96  |
| 0     | 0     | 0   | 0.928 | 0 | 0.928 |
| 0     | 0.884 | 0   | 0.971 | 0 | 0.926 |
| 0     | 0.149 | 0   | 0.888 | 0 | 0.901 |
| 0     | 0.889 | 0.9 | 0.99  | 0 | 0.999 |
| 0     | 0.999 | 0.9 | 0.985 | 0 | 0.999 |
| 0     | 0.934 | 0   | 0.974 | 0 | 0.998 |
| 0     | 0.604 | 0   | 0.993 | 0 | 0.997 |
| 0     | 0.807 | 0.8 | 0.689 | 0 | 0.987 |
| 0     | 0.812 | 0   | 0.731 | 0 | 0.947 |
| 0     | 0     | 0   | 0.93  | 0 | 0.93  |
| 0     | 0.104 | 0   | 0.896 | 0 | 0.903 |
| 0     | 0     | 0.9 | 0.295 | 0 | 0.926 |
| 0     | 0.088 | 0.9 | 0.172 | 0 | 0.917 |
| 0     | 0.988 | 0.9 | 0.981 | 0 | 0.998 |
| 0     | 0.567 | 0.9 | 0.472 | 0 | 0.962 |
| 0     | 0.601 | 0.8 | 0.259 | 0 | 0.935 |
| 0     | 0     | 0.9 | 0.593 | 0 | 0.919 |
| 0     | 0     | 0.9 | 0.417 | 0 | 0.914 |
| 0     | 0     | 0.9 | 0.243 | 0 | 0.907 |
| 0     | 0     | 0.9 | 0.251 | 0 | 0.906 |
| 0     | 0.812 | 0   | 0.88  | 0 | 0.977 |
| 0.115 | 0.576 | 0.9 | 0.299 | 0 | 0.962 |
| 0     | 0     | 0.9 | 0.517 | 0 | 0.949 |
| 0     | 0     | 0.9 | 0.509 | 0 | 0.948 |
| 0     | 0     | 0.9 | 0.407 | 0 | 0.938 |
| 0     | 0     | 0   | 0.929 | 0 | 0.929 |
| 0     | 0     | 0   | 0.924 | 0 | 0.924 |
| 0     | 0     | 0.9 | 0.235 | 0 | 0.92  |
| 0     | 0     | 0.9 | 0.163 | 0 | 0.912 |
| 0     | 0     | 0   | 0.912 | 0 | 0.912 |
| 0     | 0     | 0.9 | 0.142 | 0 | 0.91  |

|       |       |     |       |   |       |
|-------|-------|-----|-------|---|-------|
| 0     | 0     | 0.9 | 0.145 | 0 | 0.91  |
| 0     | 0     | 0.9 | 0.077 | 0 | 0.903 |
| 0     | 0     | 0.9 | 0     | 0 | 0.9   |
| 0     | 0.98  | 0.9 | 0.886 | 0 | 0.999 |
| 0     | 0.572 | 0.8 | 0.538 | 0 | 0.956 |
| 0     | 0     | 0.9 | 0.288 | 0 | 0.925 |
| 0     | 0     | 0.9 | 0.458 | 0 | 0.914 |
| 0     | 0     | 0.9 | 0.168 | 0 | 0.913 |
| 0     | 0     | 0.9 | 0.16  | 0 | 0.912 |
| 0     | 0     | 0.9 | 0.129 | 0 | 0.909 |
| 0     | 0     | 0.9 | 0.341 | 0 | 0.908 |
| 0     | 0     | 0.9 | 0.092 | 0 | 0.905 |
| 0     | 0     | 0.9 | 0.113 | 0 | 0.902 |
| 0     | 0     | 0.9 | 0.066 | 0 | 0.902 |
| 0     | 0     | 0.9 | 0     | 0 | 0.9   |
| 0     | 0     | 0.9 | 0.045 | 0 | 0.9   |
| 0     | 0.326 | 0.8 | 0.564 | 0 | 0.936 |
| 0.099 | 0     | 0   | 0.9   | 0 | 0.906 |
| 0     | 0.088 | 0.8 | 0.53  | 0 | 0.906 |
| 0     | 0.82  | 0.9 | 0.975 | 0 | 0.999 |
| 0     | 0.823 | 0.9 | 0.989 | 0 | 0.983 |
| 0     | 0.088 | 0.9 | 0.472 | 0 | 0.947 |
| 0     | 0.09  | 0.9 | 0.917 | 0 | 0.913 |
| 0     | 0.076 | 0.9 | 0.744 | 0 | 0.914 |
| 0     | 0.076 | 0.9 | 0.605 | 0 | 0.911 |
| 0     | 0     | 0.9 | 0.764 | 0 | 0.901 |
| 0     | 0     | 0.9 | 0.649 | 0 | 0.901 |
| 0     | 0.076 | 0.9 | 0.718 | 0 | 0.915 |
| 0     | 0.076 | 0.9 | 0.679 | 0 | 0.913 |
| 0     | 0     | 0.9 | 0.59  | 0 | 0.901 |
| 0     | 0     | 0.9 | 0.647 | 0 | 0.901 |
| 0     | 0     | 0.9 | 0.63  | 0 | 0.901 |
| 0     | 0.076 | 0.9 | 0.909 | 0 | 0.917 |
| 0     | 0.076 | 0.9 | 0.885 | 0 | 0.916 |
| 0     | 0     | 0.9 | 0.733 | 0 | 0.901 |
| 0.066 | 0.109 | 0.9 | 0.84  | 0 | 0.92  |
| 0     | 0.076 | 0.9 | 0.771 | 0 | 0.914 |
| 0     | 0     | 0.9 | 0.169 | 0 | 0.9   |
| 0     | 0.109 | 0.9 | 0.843 | 0 | 0.914 |
| 0     | 0     | 0.9 | 0.823 | 0 | 0.914 |
| 0     | 0.082 | 0.9 | 0.794 | 0 | 0.911 |
| 0     | 0.082 | 0.9 | 0.609 | 0 | 0.91  |
| 0     | 0.082 | 0.9 | 0.683 | 0 | 0.91  |
| 0     | 0     | 0.9 | 0.73  | 0 | 0.91  |
| 0     | 0     | 0.9 | 0.074 | 0 | 0.903 |
| 0     | 0     | 0.9 | 0     | 0 | 0.9   |
| 0     | 0     | 0.9 | 0.583 | 0 | 0.956 |
| 0     | 0.999 | 0.9 | 0.985 | 0 | 0.999 |
| 0     | 0.964 | 0.9 | 0.981 | 0 | 0.999 |
| 0     | 0.984 | 0.9 | 0.881 | 0 | 0.999 |
| 0     | 0.59  | 0.9 | 0.988 | 0 | 0.999 |
| 0     | 0.567 | 0   | 0.982 | 0 | 0.992 |
| 0     | 0.607 | 0.9 | 0.52  | 0 | 0.979 |
| 0     | 0.113 | 0.9 | 0.665 | 0 | 0.967 |

|       |       |     |       |   |       |
|-------|-------|-----|-------|---|-------|
| 0     | 0.113 | 0.9 | 0.665 | 0 | 0.967 |
| 0.071 | 0.346 | 0.8 | 0.737 | 0 | 0.963 |
| 0     | 0.074 | 0   | 0.944 | 0 | 0.947 |
| 0     | 0     | 0.9 | 0.463 | 0 | 0.944 |
| 0     | 0     | 0.9 | 0.458 | 0 | 0.943 |
| 0     | 0.157 | 0.9 | 0.297 | 0 | 0.935 |
| 0     | 0     | 0.9 | 0.183 | 0 | 0.914 |
| 0     | 0     | 0.9 | 0.33  | 0 | 0.911 |
| 0     | 0     | 0.9 | 0.33  | 0 | 0.911 |
| 0     | 0     | 0.9 | 0.96  | 0 | 0.907 |
| 0     | 0     | 0.9 | 0.192 | 0 | 0.905 |
| 0     | 0     | 0.9 | 0.181 | 0 | 0.905 |
| 0     | 0     | 0.9 | 0.203 | 0 | 0.905 |
| 0     | 0     | 0.9 | 0.07  | 0 | 0.903 |
| 0     | 0     | 0.9 | 0.144 | 0 | 0.902 |
| 0     | 0     | 0.9 | 0.055 | 0 | 0.901 |
| 0     | 0     | 0.9 | 0.041 | 0 | 0.9   |
| 0     | 0     | 0.9 | 0     | 0 | 0.9   |
| 0     | 0     | 0.9 | 0.065 | 0 | 0.902 |
| 0     | 0     | 0.9 | 0.897 | 0 | 0.989 |
| 0.158 | 0     | 0   | 0.973 | 0 | 0.976 |
| 0.066 | 0.576 | 0   | 0.91  | 0 | 0.961 |
| 0     | 0     | 0   | 0.943 | 0 | 0.943 |
| 0     | 0     | 0   | 0.937 | 0 | 0.937 |
| 0     | 0     | 0   | 0.927 | 0 | 0.927 |
| 0     | 0     | 0   | 0.923 | 0 | 0.923 |
| 0     | 0     | 0   | 0.912 | 0 | 0.912 |
| 0     | 0.088 | 0.9 | 0.764 | 0 | 0.976 |
| 0     | 0.227 | 0.9 | 0.958 | 0 | 0.948 |
| 0     | 0.251 | 0.9 | 0.771 | 0 | 0.944 |
| 0     | 0.998 | 0.9 | 0.996 | 0 | 0.999 |
| 0     | 0.567 | 0.9 | 0.979 | 0 | 0.999 |
| 0     | 0.993 | 0.9 | 0.876 | 0 | 0.999 |
| 0     | 0.576 | 0   | 0.992 | 0 | 0.996 |
| 0     | 0.576 | 0.9 | 0.388 | 0 | 0.971 |
| 0     | 0.567 | 0   | 0.902 | 0 | 0.955 |
| 0     | 0.237 | 0.8 | 0.669 | 0 | 0.945 |
| 0     | 0     | 0   | 0.927 | 0 | 0.927 |
| 0     | 0     | 0   | 0.923 | 0 | 0.923 |
| 0     | 0     | 0.9 | 0.163 | 0 | 0.912 |
| 0     | 0.104 | 0.8 | 0.516 | 0 | 0.905 |
| 0     | 0.576 | 0.9 | 0.242 | 0 | 0.965 |
| 0     | 0     | 0.9 | 0.525 | 0 | 0.95  |
| 0     | 0     | 0.9 | 0.378 | 0 | 0.935 |
| 0     | 0     | 0.9 | 0.283 | 0 | 0.925 |
| 0     | 0     | 0.9 | 0.125 | 0 | 0.908 |
| 0     | 0     | 0.9 | 0.053 | 0 | 0.901 |
| 0     | 0.576 | 0.9 | 0.289 | 0 | 0.967 |
| 0     | 0     | 0.9 | 0.472 | 0 | 0.944 |
| 0     | 0.101 | 0.9 | 0.267 | 0 | 0.928 |
| 0     | 0.968 | 0.9 | 0.976 | 0 | 0.999 |
| 0     | 0.985 | 0.9 | 0.992 | 0 | 0.999 |
| 0     | 0.92  | 0.9 | 0.974 | 0 | 0.999 |
| 0     | 0     | 0.9 | 0.943 | 0 | 0.994 |

|       |       |     |       |   |       |
|-------|-------|-----|-------|---|-------|
| 0     | 0.819 | 0.9 | 0.932 | 0 | 0.987 |
| 0     | 0.812 | 0.9 | 0.207 | 0 | 0.983 |
| 0     | 0.593 | 0.9 | 0.744 | 0 | 0.969 |
| 0     | 0.088 | 0.9 | 0.643 | 0 | 0.964 |
| 0     | 0.812 | 0   | 0.793 | 0 | 0.959 |
| 0     | 0.113 | 0.9 | 0.572 | 0 | 0.958 |
| 0     | 0     | 0.9 | 0.359 | 0 | 0.933 |
| 0     | 0     | 0   | 0.929 | 0 | 0.93  |
| 0     | 0.194 | 0.9 | 0.457 | 0 | 0.928 |
| 0     | 0     | 0.9 | 0.228 | 0 | 0.919 |
| 0     | 0.576 | 0   | 0.811 | 0 | 0.916 |
| 0     | 0.088 | 0.8 | 0.575 | 0 | 0.915 |
| 0     | 0     | 0.9 | 0.096 | 0 | 0.905 |
| 0     | 0.851 | 0   | 0.962 | 0 | 0.904 |
| 0     | 0     | 0.9 | 0.068 | 0 | 0.902 |
| 0     | 0.1   | 0.9 | 0.943 | 0 | 0.994 |
| 0     | 0.963 | 0.9 | 0.981 | 0 | 0.996 |
| 0     | 0.576 | 0.9 | 0.271 | 0 | 0.966 |
| 0     | 0     | 0   | 0.909 | 0 | 0.909 |
| 0     | 0.111 | 0.9 | 0.612 | 0 | 0.962 |
| 0     | 0.149 | 0.9 | 0.464 | 0 | 0.95  |
| 0     | 0.101 | 0.9 | 0.446 | 0 | 0.921 |
| 0     | 0     | 0.9 | 0.725 | 0 | 0.971 |
| 0     | 0     | 0.9 | 0.508 | 0 | 0.948 |
| 0     | 0     | 0.9 | 0.748 | 0 | 0.905 |
| 0     | 0     | 0.9 | 0.962 | 0 | 0.996 |
| 0     | 0     | 0.9 | 0.811 | 0 | 0.98  |
| 0     | 0     | 0.9 | 0.659 | 0 | 0.964 |
| 0     | 0     | 0.9 | 0.215 | 0 | 0.918 |
| 0     | 0     | 0.9 | 0.813 | 0 | 0.905 |
| 0     | 0     | 0.9 | 0.493 | 0 | 0.902 |
| 0     | 0.919 | 0.9 | 0.344 | 0 | 0.994 |
| 0     | 0.982 | 0.8 | 0.551 | 0 | 0.996 |
| 0     | 0.601 | 0.9 | 0.395 | 0 | 0.973 |
| 0     | 0     | 0.9 | 0.566 | 0 | 0.903 |
| 0     | 0     | 0   | 0.901 | 0 | 0.901 |
| 0     | 0.912 | 0   | 0.885 | 0 | 0.989 |
| 0     | 0.576 | 0   | 0.901 | 0 | 0.956 |
| 0     | 0.812 | 0   | 0.703 | 0 | 0.941 |
| 0     | 0.576 | 0   | 0.823 | 0 | 0.921 |
| 0     | 0.992 | 0.9 | 0.986 | 0 | 0.999 |
| 0     | 0.999 | 0.9 | 0.789 | 0 | 0.999 |
| 0     | 0.999 | 0.9 | 0.99  | 0 | 0.999 |
| 0     | 0.999 | 0.9 | 0.987 | 0 | 0.999 |
| 0     | 0.638 | 0.9 | 0.842 | 0 | 0.993 |
| 0     | 0.194 | 0.9 | 0.758 | 0 | 0.978 |
| 0     | 0     | 0.9 | 0.478 | 0 | 0.945 |
| 0     | 0     | 0.9 | 0.682 | 0 | 0.966 |
| 0     | 0     | 0.9 | 0.874 | 0 | 0.986 |
| 0     | 0     | 0   | 0.928 | 0 | 0.928 |
| 0     | 0     | 0   | 0.928 | 0 | 0.928 |
| 0.113 | 0     | 0.9 | 0.914 | 0 | 0.924 |
| 0     | 0     | 0.9 | 0.216 | 0 | 0.918 |
| 0     | 0     | 0   | 0.915 | 0 | 0.915 |

|       |       |       |       |       |       |       |
|-------|-------|-------|-------|-------|-------|-------|
|       | 0     | 0     | 0     | 0.912 | 0     | 0.912 |
|       | 0     | 0     | 0     | 0.928 | 0     | 0.928 |
|       | 0     | 0.576 | 0.9   | 0.962 | 0     | 0.998 |
|       | 0     | 0     | 0     | 0.952 | 0     | 0.952 |
|       | 0     | 0     | 0     | 0.949 | 0     | 0.949 |
|       | 0     | 0     | 0     | 0.947 | 0     | 0.947 |
|       | 0     | 0     | 0     | 0.942 | 0     | 0.942 |
|       | 0     | 0     | 0     | 0.94  | 0     | 0.94  |
| 0.066 | 0     | 0     | 0     | 0.937 | 0     | 0.939 |
| 0     | 0     | 0.9   | 0.358 | 0     | 0.933 |       |
| 0.113 | 0     | 0.9   | 0.982 | 0     | 0.93  |       |
| 0     | 0     | 0     | 0.928 | 0     | 0.929 |       |
| 0     | 0     | 0     | 0.926 | 0     | 0.926 |       |
| 0     | 0     | 0.9   | 0.989 | 0     | 0.905 |       |
| 0     | 0     | 0     | 0.902 | 0     | 0.902 |       |
| 0     | 0.82  | 0.9   | 0.964 | 0     | 0.999 |       |
| 0     | 0.999 | 0.9   | 0.995 | 0     | 0.999 |       |
| 0     | 0.999 | 0.9   | 0.996 | 0     | 0.999 |       |
| 0     | 0.917 | 0.9   | 0.942 | 0     | 0.999 |       |
| 0     | 0.999 | 0.9   | 0.997 | 0     | 0.999 |       |
| 0     | 0.999 | 0.9   | 0.995 | 0     | 0.999 |       |
| 0.168 | 0.999 | 0.9   | 0.996 | 0     | 0.999 |       |
| 0     | 0.706 | 0.9   | 0.881 | 0     | 0.996 |       |
| 0     | 0.576 | 0     | 0.972 | 0     | 0.988 |       |
| 0     | 0.293 | 0.9   | 0.823 | 0     | 0.986 |       |
| 0     | 0.292 | 0.9   | 0.731 | 0     | 0.979 |       |
| 0     | 0     | 0.9   | 0.772 | 0     | 0.976 |       |
| 0     | 0.292 | 0.9   | 0.898 | 0     | 0.951 |       |
| 0     | 0     | 0     | 0.949 | 0     | 0.949 |       |
| 0     | 0.088 | 0     | 0.943 | 0     | 0.947 |       |
| 0.073 | 0     | 0     | 0.929 | 0     | 0.932 |       |
| 0     | 0     | 0     | 0.912 | 0     | 0.912 |       |
| 0     | 0     | 0.8   | 0.566 | 0     | 0.909 |       |
| 0     | 0.088 | 0     | 0.901 | 0     | 0.906 |       |
| 0     | 0.318 | 0.8   | 0.336 | 0     | 0.901 |       |
| 0     | 0     | 0.9   | 0.118 | 0     | 0.908 |       |
| 0     | 0     | 0.9   | 0.247 | 0     | 0.907 |       |
| 0     | 0     | 0.8   | 0.648 | 0     | 0.926 |       |
| 0     | 0     | 0.9   | 0.206 | 0     | 0.917 |       |
| 0     | 0     | 0.9   | 0.701 | 0     | 0.968 |       |
| 0     | 0     | 0.9   | 0.331 | 0     | 0.93  |       |
| 0     | 0.812 | 0.9   | 0.263 | 0     | 0.981 |       |
| 0     | 0.576 | 0.9   | 0.954 | 0     | 0.966 |       |
| 0     | 0     | 0.9   | 0.503 | 0     | 0.948 |       |
| 0     | 0     | 0.9   | 0.959 | 0     | 0.902 |       |
| 0     | 0     | 0     | 0.956 | 0     | 0.957 |       |
| 0     | 0     | 0.9   | 0.277 | 0     | 0.924 |       |
| 0     | 0     | 0.9   | 0.487 | 0     | 0.914 |       |
| 0     | 0.92  | 0.9   | 0.973 | 0     | 0.999 |       |
| 0     | 0.996 | 0.9   | 0.928 | 0     | 0.999 |       |
| 0     | 0     | 0.9   | 0.859 | 0     | 0.985 |       |
| 0     | 0.576 | 0.9   | 0.326 | 0     | 0.968 |       |
| 0     | 0     | 0.9   | 0.243 | 0     | 0.921 |       |
| 0     | 0     | 0.9   | 0.18  | 0     | 0.905 |       |

|       |       |     |       |   |       |
|-------|-------|-----|-------|---|-------|
| 0     | 0.898 | 0   | 0.603 | 0 | 0.921 |
| 0     | 0.663 | 0.9 | 0.88  | 0 | 0.995 |
| 0     | 0.81  | 0.9 | 0.539 | 0 | 0.99  |
| 0     | 0.596 | 0.9 | 0.556 | 0 | 0.98  |
| 0     | 0     | 0.9 | 0.652 | 0 | 0.963 |
| 0     | 0.088 | 0.9 | 0.53  | 0 | 0.953 |
| 0     | 0.088 | 0.9 | 0.3   | 0 | 0.93  |
| 0     | 0     | 0.8 | 0.662 | 0 | 0.929 |
| 0     | 0     | 0.9 | 0.291 | 0 | 0.926 |
| 0     | 0     | 0.9 | 0.163 | 0 | 0.912 |
| 0     | 0     | 0.9 | 0.069 | 0 | 0.902 |
| 0     | 0     | 0.9 | 0     | 0 | 0.9   |
| 0     | 0     | 0.9 | 0     | 0 | 0.9   |
| 0     | 0.96  | 0.8 | 0.58  | 0 | 0.996 |
| 0     | 0.251 | 0.9 | 0.915 | 0 | 0.993 |
| 0     | 0.954 | 0.8 | 0.347 | 0 | 0.993 |
| 0     | 0.576 | 0.8 | 0.802 | 0 | 0.981 |
| 0     | 0.245 | 0.8 | 0.829 | 0 | 0.972 |
| 0     | 0     | 0.8 | 0.656 | 0 | 0.928 |
| 0     | 0     | 0.9 | 0.908 | 0 | 0.915 |
| 0     | 0     | 0.9 | 0.879 | 0 | 0.987 |
| 0     | 0     | 0.9 | 0.584 | 0 | 0.956 |
| 0     | 0     | 0.9 | 0.394 | 0 | 0.936 |
| 0     | 0     | 0.9 | 0     | 0 | 0.9   |
| 0     | 0.576 | 0.9 | 0.98  | 0 | 0.999 |
| 0.141 | 0     | 0.9 | 0.757 | 0 | 0.977 |
| 0     | 0     | 0.9 | 0.266 | 0 | 0.923 |
| 0     | 0.601 | 0.9 | 0.317 | 0 | 0.97  |
| 0     | 0     | 0.9 | 0.71  | 0 | 0.969 |
| 0     | 0     | 0   | 0.942 | 0 | 0.942 |
| 0     | 0     | 0   | 0.937 | 0 | 0.937 |
| 0     | 0     | 0.9 | 0.892 | 0 | 0.93  |
| 0     | 0     | 0.9 | 0.7   | 0 | 0.924 |
| 0     | 0     | 0.9 | 0.509 | 0 | 0.913 |
| 0     | 0     | 0.9 | 0.394 | 0 | 0.912 |
| 0     | 0     | 0.9 | 0.267 | 0 | 0.906 |
| 0     | 0     | 0.9 | 0.822 | 0 | 0.902 |
| 0     | 0     | 0.9 | 0.826 | 0 | 0.902 |
| 0     | 0.915 | 0.9 | 0.639 | 0 | 0.993 |
| 0     | 0     | 0.9 | 0.721 | 0 | 0.97  |
| 0     | 0     | 0.9 | 0.383 | 0 | 0.935 |
| 0     | 0     | 0.9 | 0.35  | 0 | 0.932 |
| 0     | 0     | 0.9 | 0.882 | 0 | 0.924 |
| 0     | 0     | 0   | 0.923 | 0 | 0.923 |
| 0     | 0     | 0   | 0.912 | 0 | 0.912 |
| 0     | 0     | 0.9 | 0.293 | 0 | 0.908 |
| 0     | 0     | 0   | 0.903 | 0 | 0.903 |
| 0     | 0     | 0.9 | 0.915 | 0 | 0.903 |
| 0     | 0.923 | 0.9 | 0.354 | 0 | 0.992 |
| 0     | 0.884 | 0.9 | 0.885 | 0 | 0.991 |
| 0     | 0.812 | 0.9 | 0.091 | 0 | 0.981 |
| 0     | 0.677 | 0.9 | 0.464 | 0 | 0.981 |
| 0     | 0.617 | 0.9 | 0.512 | 0 | 0.979 |
| 0     | 0.576 | 0.9 | 0.916 | 0 | 0.97  |



|       |       |     |       |   |       |
|-------|-------|-----|-------|---|-------|
| 0     | 0.812 | 0.8 | 0.124 | 0 | 0.964 |
| 0     | 0.602 | 0.9 | 0.264 | 0 | 0.962 |
| 0     | 0.576 | 0.9 | 0.101 | 0 | 0.958 |
| 0     | 0.149 | 0.9 | 0.453 | 0 | 0.949 |
| 0     | 0.347 | 0.9 | 0.69  | 0 | 0.948 |
| 0     | 0.576 | 0   | 0.878 | 0 | 0.946 |
| 0     | 0.251 | 0.9 | 0.342 | 0 | 0.946 |
| 0     | 0.157 | 0.9 | 0.397 | 0 | 0.944 |
| 0     | 0.215 | 0.9 | 0.584 | 0 | 0.925 |
| 0     | 0.101 | 0.9 | 0.289 | 0 | 0.915 |
| 0     | 0.101 | 0.9 | 0.244 | 0 | 0.913 |
| 0     | 0     | 0.9 | 0.077 | 0 | 0.903 |
| 0     | 0     | 0.9 | 0.765 | 0 | 0.901 |
| 0     | 0.576 | 0.9 | 0.252 | 0 | 0.959 |
| 0     | 0.215 | 0.9 | 0.439 | 0 | 0.924 |
| 0     | 0     | 0.9 | 0.462 | 0 | 0.916 |
| 0     | 0     | 0.9 | 0.36  | 0 | 0.912 |
| 0     | 0.347 | 0.9 | 0.559 | 0 | 0.945 |
| 0     | 0.157 | 0.9 | 0.146 | 0 | 0.921 |
| 0     | 0.965 | 0.9 | 0.994 | 0 | 0.999 |
| 0     | 0.824 | 0   | 0.939 | 0 | 0.988 |
| 0     | 0     | 0.9 | 0.734 | 0 | 0.972 |
| 0     | 0     | 0.9 | 0.654 | 0 | 0.963 |
| 0     | 0     | 0.9 | 0.291 | 0 | 0.926 |
| 0     | 0     | 0.9 | 0.211 | 0 | 0.917 |
| 0     | 0     | 0.9 | 0.071 | 0 | 0.903 |
| 0     | 0     | 0.9 | 0     | 0 | 0.9   |
| 0     | 0     | 0.9 | 0.043 | 0 | 0.9   |
| 0     | 0     | 0.9 | 0     | 0 | 0.9   |
| 0     | 0     | 0.9 | 0     | 0 | 0.9   |
| 0     | 0     | 0.9 | 0     | 0 | 0.9   |
| 0     | 0     | 0.9 | 0     | 0 | 0.93  |
| 0     | 0.961 | 0   | 0.94  | 0 | 0.997 |
| 0     | 0     | 0.9 | 0.871 | 0 | 0.986 |
| 0     | 0     | 0.9 | 0.844 | 0 | 0.983 |
| 0     | 0     | 0   | 0.942 | 0 | 0.942 |
| 0     | 0     | 0   | 0.939 | 0 | 0.94  |
| 0     | 0     | 0   | 0.916 | 0 | 0.916 |
| 0.073 | 0     | 0   | 0.912 | 0 | 0.915 |
| 0     | 0     | 0   | 0.908 | 0 | 0.908 |
| 0     | 0.149 | 0   | 0.891 | 0 | 0.904 |
| 0     | 0.919 | 0.9 | 0.94  | 0 | 0.999 |
| 0     | 0.957 | 0.9 | 0.982 | 0 | 0.999 |
| 0     | 0.917 | 0.9 | 0.946 | 0 | 0.999 |
| 0     | 0.991 | 0.9 | 0.977 | 0 | 0.999 |
| 0     | 0.999 | 0.9 | 0.952 | 0 | 0.999 |
| 0     | 0.583 | 0.9 | 0.926 | 0 | 0.996 |
| 0     | 0.841 | 0.9 | 0.551 | 0 | 0.992 |
| 0     | 0     | 0.9 | 0.921 | 0 | 0.991 |
| 0     | 0     | 0.9 | 0.882 | 0 | 0.987 |
| 0     | 0.576 | 0   | 0.967 | 0 | 0.985 |
| 0.069 | 0.361 | 0.9 | 0.732 | 0 | 0.981 |
| 0     | 0.253 | 0.9 | 0.775 | 0 | 0.981 |
| 0     | 0     | 0.9 | 0.815 | 0 | 0.98  |

|       |       |     |       |   |       |
|-------|-------|-----|-------|---|-------|
| 0     | 0     | 0   | 0.929 | 0 | 0.93  |
| 0     | 0.588 | 0   | 0.787 | 0 | 0.909 |
| 0.071 | 0.987 | 0.9 | 0.862 | 0 | 0.999 |
| 0     | 0     | 0   | 0.922 | 0 | 0.922 |
| 0     | 0     | 0   | 0.912 | 0 | 0.912 |
| 0     | 0     | 0   | 0.909 | 0 | 0.909 |
| 0     | 0.986 | 0   | 0.445 | 0 | 0.992 |
| 0     | 0.326 | 0.9 | 0.705 | 0 | 0.978 |
| 0     | 0.594 | 0.9 | 0.378 | 0 | 0.972 |
| 0     | 0.088 | 0.9 | 0.572 | 0 | 0.957 |
| 0     | 0.104 | 0.9 | 0.289 | 0 | 0.93  |
| 0     | 0.881 | 0   | 0.75  | 0 | 0.914 |
| 0     | 0.974 | 0   | 0.987 | 0 | 0.999 |
| 0     | 0.997 | 0.9 | 0.986 | 0 | 0.999 |
| 0     | 0.999 | 0   | 0.882 | 0 | 0.999 |
| 0     | 0.81  | 0   | 0.99  | 0 | 0.998 |
| 0     | 0.671 | 0.9 | 0.702 | 0 | 0.973 |
| 0     | 0.999 | 0.9 | 0.992 | 0 | 0.999 |
| 0     | 0.802 | 0.9 | 0.933 | 0 | 0.998 |
| 0     | 0.672 | 0.9 | 0.917 | 0 | 0.997 |
| 0     | 0.808 | 0   | 0.545 | 0 | 0.909 |
| 0     | 0.576 | 0.9 | 0.913 | 0 | 0.996 |
| 0     | 0     | 0.9 | 0.859 | 0 | 0.985 |
| 0     | 0.576 | 0.9 | 0.347 | 0 | 0.969 |
| 0     | 0     | 0.9 | 0.194 | 0 | 0.915 |
| 0     | 0     | 0.9 | 0.041 | 0 | 0.9   |
| 0     | 0     | 0.9 | 0     | 0 | 0.9   |
| 0     | 0     | 0.9 | 0.046 | 0 | 0.9   |
| 0     | 0.815 | 0.9 | 0.964 | 0 | 0.999 |
| 0     | 0.967 | 0.9 | 0.933 | 0 | 0.999 |
| 0     | 0.921 | 0.9 | 0.9   | 0 | 0.999 |
| 0     | 0.983 | 0.9 | 0.985 | 0 | 0.999 |
| 0     | 0.969 | 0.9 | 0.907 | 0 | 0.999 |
| 0     | 0.999 | 0.9 | 0.989 | 0 | 0.999 |
| 0     | 0.576 | 0.9 | 0.967 | 0 | 0.998 |
| 0     | 0.641 | 0.9 | 0.906 | 0 | 0.996 |
| 0     | 0.594 | 0.9 | 0.925 | 0 | 0.996 |
| 0     | 0.648 | 0.8 | 0.924 | 0 | 0.994 |
| 0     | 0.237 | 0.9 | 0.901 | 0 | 0.991 |
| 0     | 0.808 | 0.9 | 0.58  | 0 | 0.991 |
| 0     | 0.603 | 0.8 | 0.893 | 0 | 0.99  |
| 0     | 0.57  | 0.9 | 0.806 | 0 | 0.99  |
| 0     | 0     | 0.9 | 0.876 | 0 | 0.987 |
| 0     | 0.564 | 0.9 | 0.959 | 0 | 0.971 |
| 0     | 0.576 | 0.9 | 0.217 | 0 | 0.963 |
| 0     | 0     | 0.9 | 0.638 | 0 | 0.962 |
| 0     | 0     | 0.9 | 0.628 | 0 | 0.961 |
| 0     | 0     | 0.9 | 0.458 | 0 | 0.943 |
| 0     | 0.917 | 0   | 0.309 | 0 | 0.94  |
| 0     | 0.105 | 0.9 | 0.214 | 0 | 0.923 |
| 0     | 0     | 0.9 | 0.234 | 0 | 0.92  |
| 0     | 0     | 0.9 | 0.081 | 0 | 0.904 |
| 0     | 0.808 | 0   | 0.509 | 0 | 0.901 |
| 0     | 0     | 0   | 0.9   | 0 | 0.9   |

|       |       |     |       |   |       |
|-------|-------|-----|-------|---|-------|
| 0     | 0     | 0.9 | 0     | 0 | 0.9   |
| 0     | 0     | 0   | 0.973 | 0 | 0.973 |
| 0     | 0     | 0   | 0.917 | 0 | 0.918 |
| 0     | 0     | 0   | 0.91  | 0 | 0.91  |
| 0     | 0     | 0   | 0.909 | 0 | 0.909 |
| 0     | 0.915 | 0.9 | 0.952 | 0 | 0.999 |
| 0     | 0.868 | 0.9 | 0.917 | 0 | 0.998 |
| 0     | 0     | 0.9 | 0.974 | 0 | 0.997 |
| 0     | 0.807 | 0.9 | 0.518 | 0 | 0.989 |
| 0     | 0     | 0.9 | 0.838 | 0 | 0.983 |
| 0     | 0     | 0   | 0.953 | 0 | 0.954 |
| 0     | 0     | 0.9 | 0.501 | 0 | 0.948 |
| 0     | 0     | 0   | 0.921 | 0 | 0.922 |
| 0     | 0     | 0   | 0.903 | 0 | 0.903 |
| 0     | 0.963 | 0   | 0.896 | 0 | 0.996 |
| 0     | 0.591 | 0.9 | 0.323 | 0 | 0.969 |
| 0     | 0.576 | 0.9 | 0.307 | 0 | 0.968 |
| 0     | 0.074 | 0.9 | 0.942 | 0 | 0.938 |
| 0     | 0.194 | 0.9 | 0.453 | 0 | 0.929 |
| 0     | 0.088 | 0.9 | 0.262 | 0 | 0.926 |
| 0     | 0.576 | 0   | 0.808 | 0 | 0.915 |
| 0     | 0     | 0.9 | 0.661 | 0 | 0.964 |
| 0     | 0     | 0.9 | 0.56  | 0 | 0.954 |
| 0     | 0     | 0.9 | 0.526 | 0 | 0.95  |
| 0     | 0.917 | 0   | 0.716 | 0 | 0.933 |
| 0     | 0     | 0.9 | 0.338 | 0 | 0.931 |
| 0     | 0     | 0.9 | 0.208 | 0 | 0.917 |
| 0     | 0     | 0.9 | 0.203 | 0 | 0.916 |
| 0     | 0     | 0.9 | 0.196 | 0 | 0.916 |
| 0     | 0     | 0.9 | 0.202 | 0 | 0.916 |
| 0     | 0     | 0.9 | 0.504 | 0 | 0.916 |
| 0     | 0     | 0.9 | 0.104 | 0 | 0.906 |
| 0     | 0     | 0.9 | 0.087 | 0 | 0.904 |
| 0     | 0     | 0.9 | 0.074 | 0 | 0.903 |
| 0     | 0     | 0.9 | 0.064 | 0 | 0.902 |
| 0     | 0     | 0.9 | 0.053 | 0 | 0.901 |
| 0     | 0     | 0.9 | 0.044 | 0 | 0.9   |
| 0     | 0     | 0.9 | 0     | 0 | 0.9   |
| 0     | 0     | 0.9 | 0     | 0 | 0.9   |
| 0     | 0.915 | 0.9 | 0.909 | 0 | 0.999 |
| 0     | 0     | 0.9 | 0.754 | 0 | 0.974 |
| 0     | 0.566 | 0.9 | 0.204 | 0 | 0.962 |
| 0     | 0     | 0.9 | 0.539 | 0 | 0.951 |
| 0     | 0     | 0.9 | 0.503 | 0 | 0.948 |
| 0     | 0     | 0.9 | 0.509 | 0 | 0.948 |
| 0     | 0     | 0.9 | 0.189 | 0 | 0.915 |
| 0     | 0     | 0   | 0.924 | 0 | 0.924 |
| 0     | 0     | 0.9 | 0.222 | 0 | 0.907 |
| 0     | 0.566 | 0.9 | 0.51  | 0 | 0.962 |
| 0     | 0     | 0.9 | 0.407 | 0 | 0.912 |
| 0     | 0     | 0.9 | 0.265 | 0 | 0.905 |
| 0     | 0     | 0   | 0.984 | 0 | 0.984 |
| 0     | 0     | 0   | 0.975 | 0 | 0.975 |
| 0.247 | 0     | 0   | 0.96  | 0 | 0.968 |

|       |       |     |       |   |       |
|-------|-------|-----|-------|---|-------|
| 0     | 0     | 0   | 0.95  | 0 | 0.95  |
| 0     | 0     | 0   | 0.934 | 0 | 0.934 |
| 0     | 0     | 0   | 0.932 | 0 | 0.932 |
| 0     | 0     | 0   | 0.911 | 0 | 0.912 |
| 0.974 | 0.985 | 0.9 | 0.996 | 0 | 0.999 |
| 0     | 0.912 | 0.9 | 0.917 | 0 | 0.999 |
| 0     | 0.988 | 0.8 | 0.508 | 0 | 0.998 |
| 0     | 0.98  | 0   | 0.877 | 0 | 0.997 |
| 0     | 0     | 0.9 | 0.942 | 0 | 0.993 |
| 0     | 0     | 0.9 | 0.913 | 0 | 0.99  |
| 0     | 0     | 0.9 | 0.912 | 0 | 0.99  |
| 0     | 0     | 0   | 0.988 | 0 | 0.988 |
| 0     | 0     | 0   | 0.979 | 0 | 0.979 |
| 0     | 0.576 | 0   | 0.95  | 0 | 0.978 |
| 0     | 0.812 | 0   | 0.856 | 0 | 0.971 |
| 0     | 0     | 0   | 0.964 | 0 | 0.965 |
| 0     | 0     | 0.9 | 0.586 | 0 | 0.956 |
| 0     | 0.914 | 0   | 0.454 | 0 | 0.951 |
| 0     | 0     | 0   | 0.948 | 0 | 0.948 |
| 0     | 0     | 0   | 0.942 | 0 | 0.942 |
| 0     | 0.564 | 0   | 0.835 | 0 | 0.925 |
| 0     | 0     | 0   | 0.899 | 0 | 0.9   |
| 0     | 0.576 | 0   | 0.868 | 0 | 0.942 |
| 0     | 0     | 0.9 | 0.065 | 0 | 0.902 |
| 0     | 0.491 | 0.9 | 0.503 | 0 | 0.972 |
| 0     | 0     | 0.9 | 0.81  | 0 | 0.928 |
| 0     | 0     | 0.9 | 0.729 | 0 | 0.926 |
| 0     | 0     | 0.9 | 0.659 | 0 | 0.919 |
| 0     | 0     | 0.9 | 0.47  | 0 | 0.915 |
| 0     | 0     | 0.9 | 0.535 | 0 | 0.914 |
| 0     | 0     | 0.9 | 0.459 | 0 | 0.913 |
| 0     | 0     | 0.9 | 0.439 | 0 | 0.912 |
| 0     | 0     | 0.9 | 0.393 | 0 | 0.91  |
