# Supplementary material for: Exploring the Pharmacological Mechanisms of Tripterygium wilfordii Hook F against Cardiovascular Disease Using Network Pharmacology and Molecular Docking
Source: Biomed Res Int. 2021 Aug 14;2021:5575621. doi: 10.1155/2021/5575621 (PMC8382521; doi:10.1155/2021/5575621)
Supplement: Supplementary Materials — Known targets of TwHF and known therapeutic targets acting on CVD were shown in Supplementary Table 1. Known protein interactions of TwHF against CVD (combined score ≥ 0.9) were shown in Supplementary Table 2. [file 5575621.f1.zip]

Archive with 2 entries (2 files):
- Supplementary Table 1.pdf
- Supplementary Table 2.pdf
